# Supplementary material for: The Structural Basis of Mycobacterium tuberculosis RpoB Drug-Resistant Clinical Mutations on Rifampicin Drug Binding
Source: MDPI journal article supplement (doi:10.3390/molecules27030885), 2022-01-28
Supplement: s1 [file s1]

## *Supplementary Material*

# The structural basis of *Mycobacterium tuberculosis* RpoB drug resistant clinical mutations on rifampicin drug binding

*Arnold Amusengeri<sup>1</sup>, Asif Ullah Khan<sup>2</sup>, and Özlem Tastan Bishop<sup>1\*</sup>*

<sup>1</sup>Research Unit in Bioinformatics (RUBi), Department of Biochemistry and Microbiology, Rhodes University, Grahamstown, 6140, South Africa; g16a7782@campus.ru.ac.za, O.TastanBishop@ru.ac.za

<sup>2</sup>Department of Biochemistry, Abdul Wali Khan University Mardan (AWKUM), Mardan-23200, Pakistan; asif@awkum.edu.pk

**\* Correspondence:**

Asifullah Khan

asif@awkum.edu.pk; Tel: +92-333-9278471

Özlem Tastan Bishop

o.tastanbishop@ru.ac.za; Tel.: +27-46-603-8072

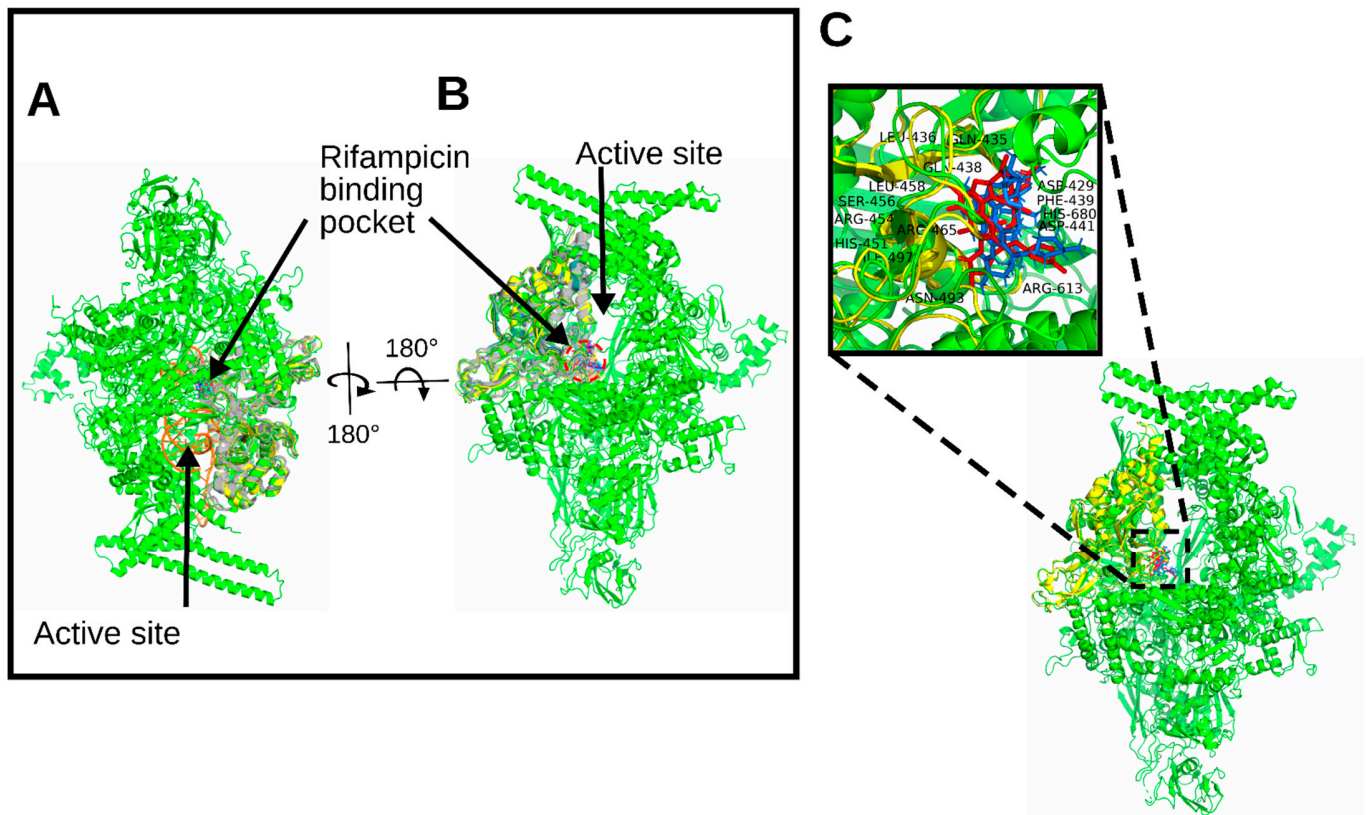

**Figure S1.** **A:** Graphical representation of the crystal structure of *Mycobacterium tuberculosis* transcription initiation complex, PDB ID: 5UHC [1], containing 3nt RNA in complex with rifampicin. The structure is superimposed to the wildtype and mutated models. Color code: Green: multiunit RNA polymerase complex; Brown: 3nt RNA strand; Yellow: Modeled wildtype structure of the  $\beta$ -subunit; Grey: Modeled mutated structures of the  $\beta$ -subunit. Rifampicin ligands docked to the structures is shown in sticks. **B:** 5UHC structure without the RNA strand: Depiction of the rifampicin binding pocket adjacent to the active center [2,3]. **C:** Zoomed in image of the rifampicin binding pocket depicting all residues within 3.7 Å distance from RIF atoms. Color code: Red: co-crystallized rifampicin bound to 5UHC; Blue: rifampicin docked to the wildtype protein.

**Table S1.** Docking scores, RMSD and post-docking interactions (hydrogen bonds) of rifampicin (RIF) in WT and mutated models of rpoB.

| Mutations       | RMSD (Å) | Docking scores (kcal/mol) | Interacting residues                   |
|-----------------|----------|---------------------------|----------------------------------------|
| Wild Type       | 0.000    | -13.80                    | Gln438, Phe439, Arg454, Ser456, Arg465 |
| Val 176 Phe-RIF | 1.468    | -8.3                      | Arg613, Ile497                         |
| Gln 415 Tyr-RIF | 0.018    | -10.4                     | Gln438, Arg454                         |
| Asn 419 His-RIF | 1.599    | -6.7                      | Arg454                                 |
| Ile 421 Val-RIF | 1.200    | -6.8                      | Gln438                                 |
| Leu 436 Pro-RIF | 1.279    | -8.3                      | No interactions                        |
| Met 440 Val-RIF | 1.653    | -6.7                      | No interactions                        |
| Asp 441 Gly-RIF | 1.538    | -6.9                      | Asn493                                 |
| Asp 441 Phe-RIF | 1.657    | -5.0                      | Gln438                                 |
| Asp 441 Tyr-RIF | 1.572    | -6.1                      | Tyr441, Arg613                         |
| Asp 441 Val-RIF | 1.272    | -6.3                      | No interactions                        |
| Gln 443 Asp-RIF | 1.432    | -7.7                      | Asp441, Gln438                         |
| Asn 444 Thr-RIF | 1.762    | -5.4                      | Asn493, Arg465                         |
| Gly 448 Arg-RIF | 1.725    | -5.2                      | Asn493                                 |
| Leu 449 Met-RIF | 1.587    | -6.8                      | No interactions                        |
| His 451 Gly-RIF | 1.734    | -5.0                      | Asn493                                 |
| His 451 Pro-RIF | 1.570    | -6.5                      | Arg454, Asn493                         |
| His 451 Tyr-RIF | 0.025    | -10.0                     | Arg454                                 |
| Arg 454 Gln-RIF | 1.555    | -6.1                      | Gln438                                 |
| Ser 456 Gln-RIF | 1.370    | -6.0                      | Thr433, Arg465                         |
| Ser 456 Trp-RIF | 1.829    | -5.4                      | Asp441, Asn443, Arg454                 |
| Ala 457 Asp-RIF | 1.571    | -6.1                      | Ile497                                 |
| Leu 458 Pro-RIF | 0.022    | -10.9                     | Arg 465                                |
| Pro 460 His-RIF | 1.384    | -7.6                      | Phe439                                 |
| Gly 461 Asp-RIF | 1.841    | -5.0                      | No interactions                        |
| Leu 463 Phe-RIF | 0.019    | -9.3                      | Arg613                                 |
| Arg 467 His-RIF | 1.391    | -9.0                      | Gln435, Gln438                         |
| Pro 489 Ser-RIF | 0.027    | -10.2                     | Phe439, Arg454                         |
| Ile 497 Phe-RIF | 1.540    | -7.6                      | Thr450                                 |
| Arg 517 Cys-RIF | 1.390    | -7.6                      | Arg465                                 |
| Val 519 Asp-RIF | 1.469    | -8.9                      | Asn493                                 |

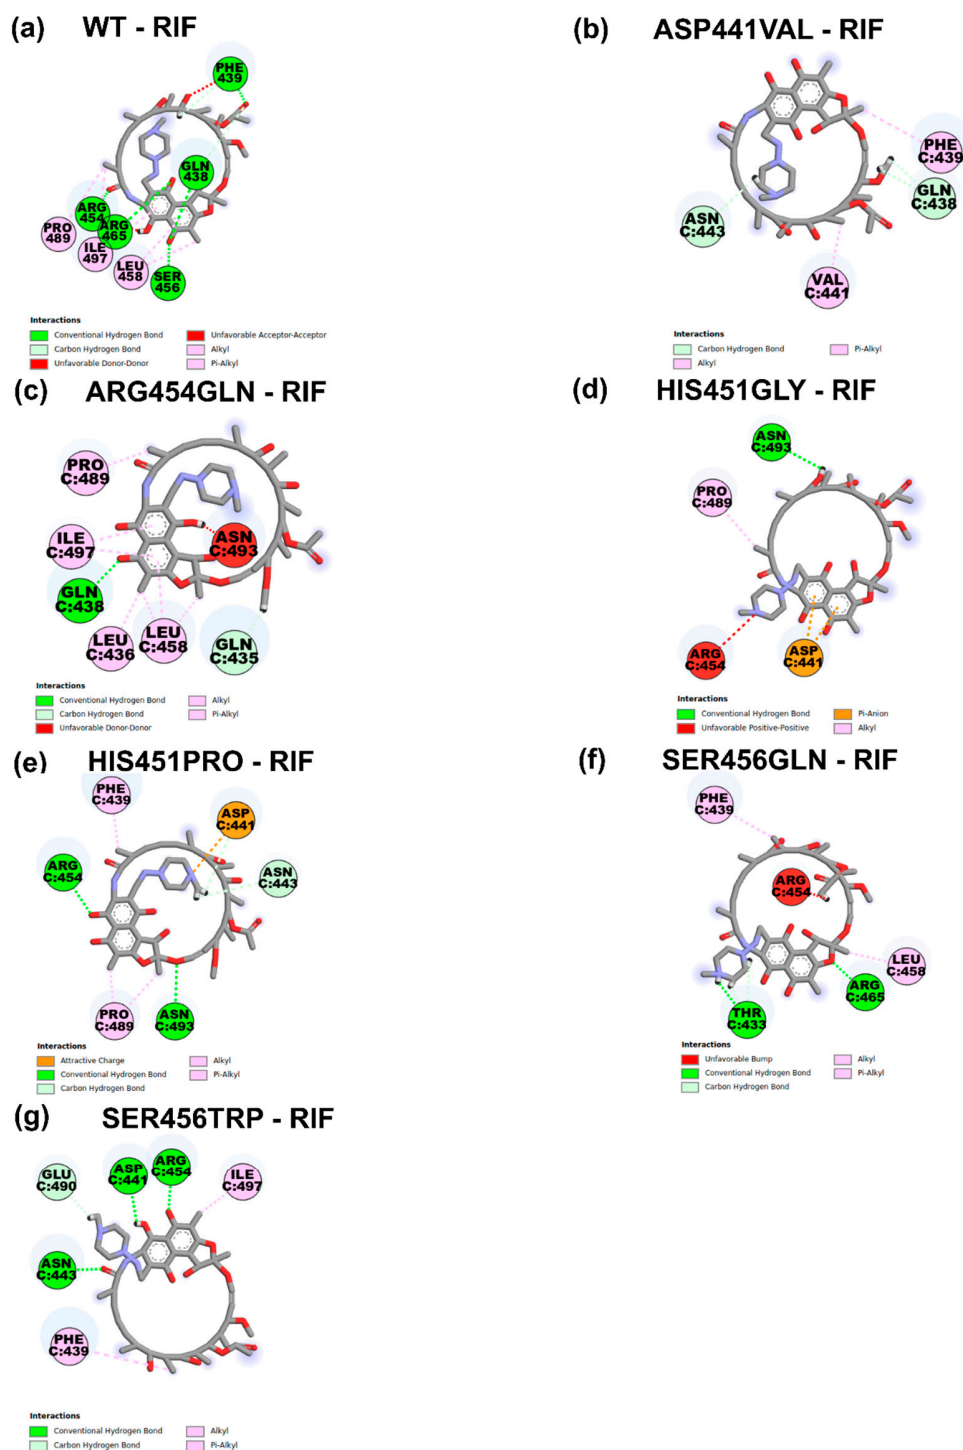

**Figure S2.** Post-docking analysis: 2D binding modes of RIF with the WT and mutated forms of *M. tuberculosis rpoB*. Molecular interactions were visualized using Discovery Studio Visualizer 4 (DS Visualizer) [4].



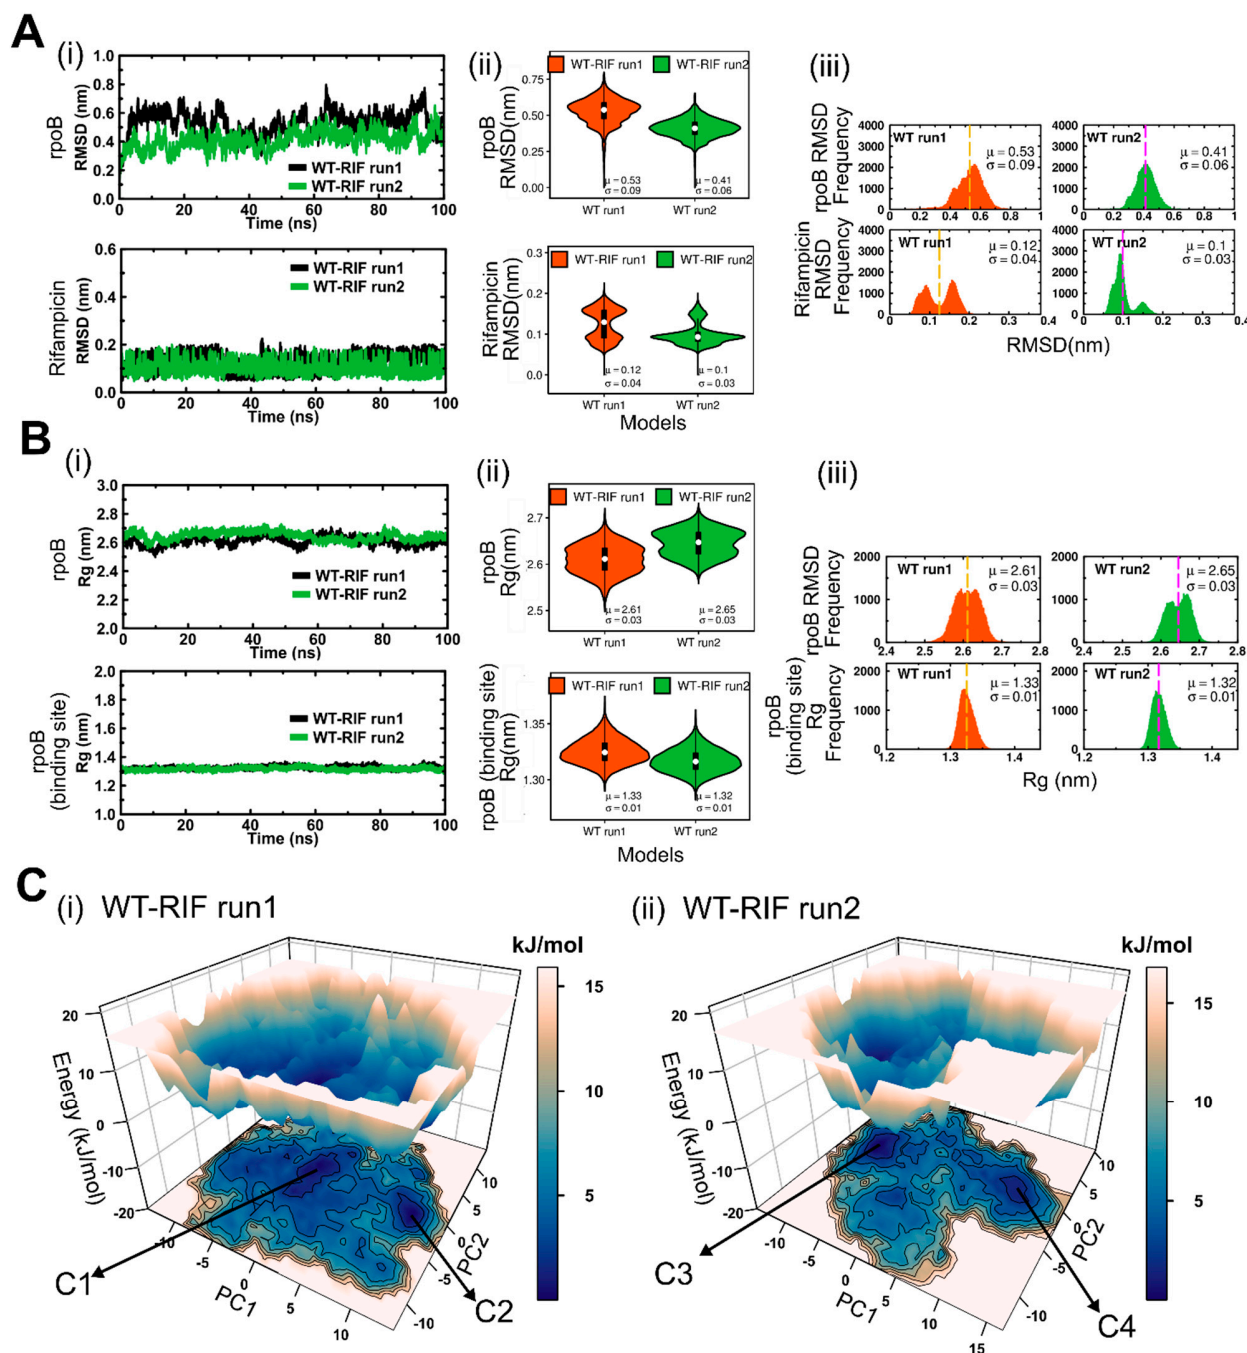

**Figure S3.** Post MD results: Preliminary assessment of the wild type model runs 1 and 2. **(A)** The protein and ligand RMSDs represented as time evolution (i), kernel density estimation violin plots (ii), and frequency histograms. **(B)** The radius of gyration calculated for the entire protein, as well as residues within rifampicin binding pocket. Colour key: Red: Run1, green: Run2. Yellow and magenta dashed lines in A(iii) and B(iii) highlight mean values of associated data. **(C)** Free energy landscapes computed as a function of PC1 and PC2. The colour ranges from white (maxima) to blue (minima). Identified conformers are labeled C1 to C4.

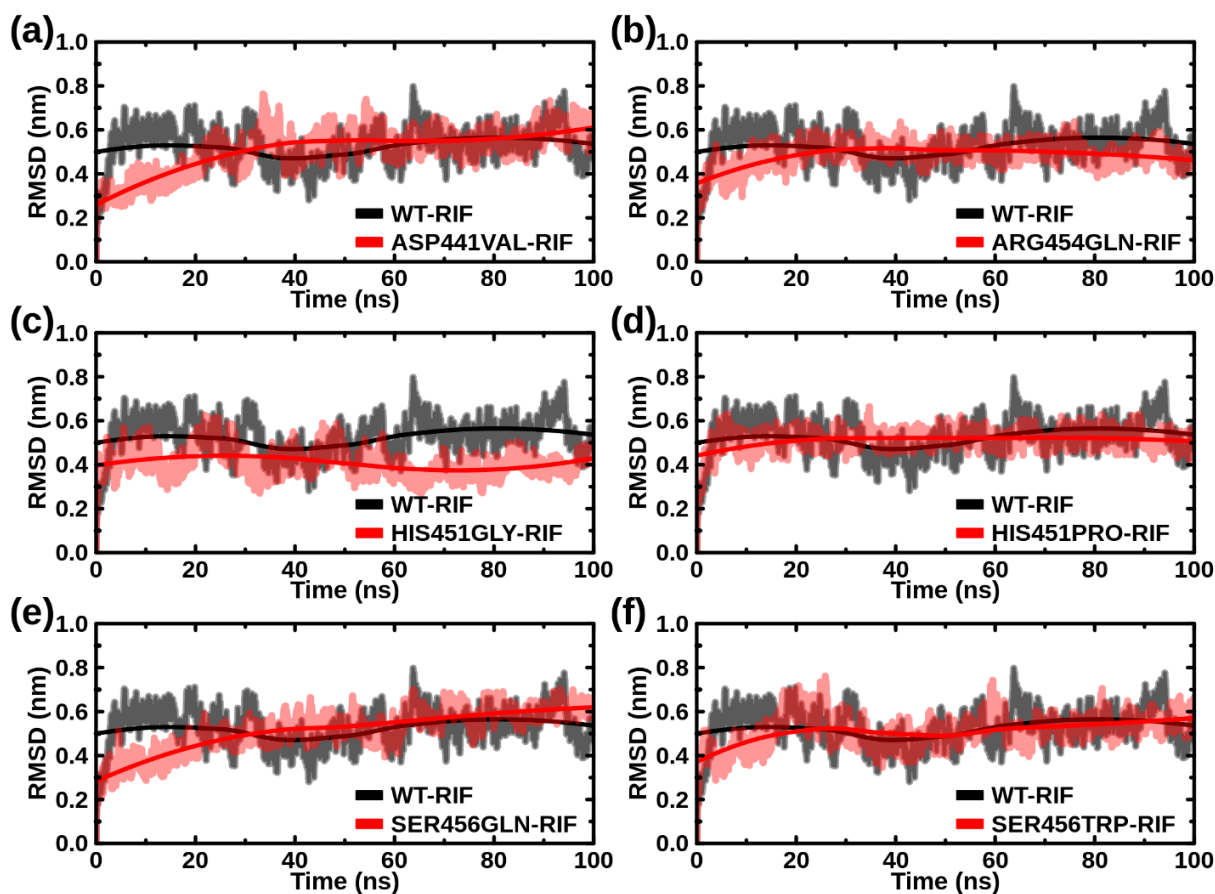

**Figure S4.** 100ns protein RMSD evolution computed with respect to backbone atom positions. Color key: Black: WT, Red: Mutants.

**Table S2.** Tabulated summary of average RMSD values acquired for each model.

| System        | Average RMSD |
|---------------|--------------|
| WT-RIF        | 0.5292       |
| Asp441Val-RIF | 0.5083       |
| Arg454Gln-RIF | 0.4862       |
| His451Gly-RIF | 0.4087       |
| His451Pro-RIF | 0.5129       |
| Ser456Gln-RIF | 0.5152       |
| Ser456Trp-RIF | 0.5137       |

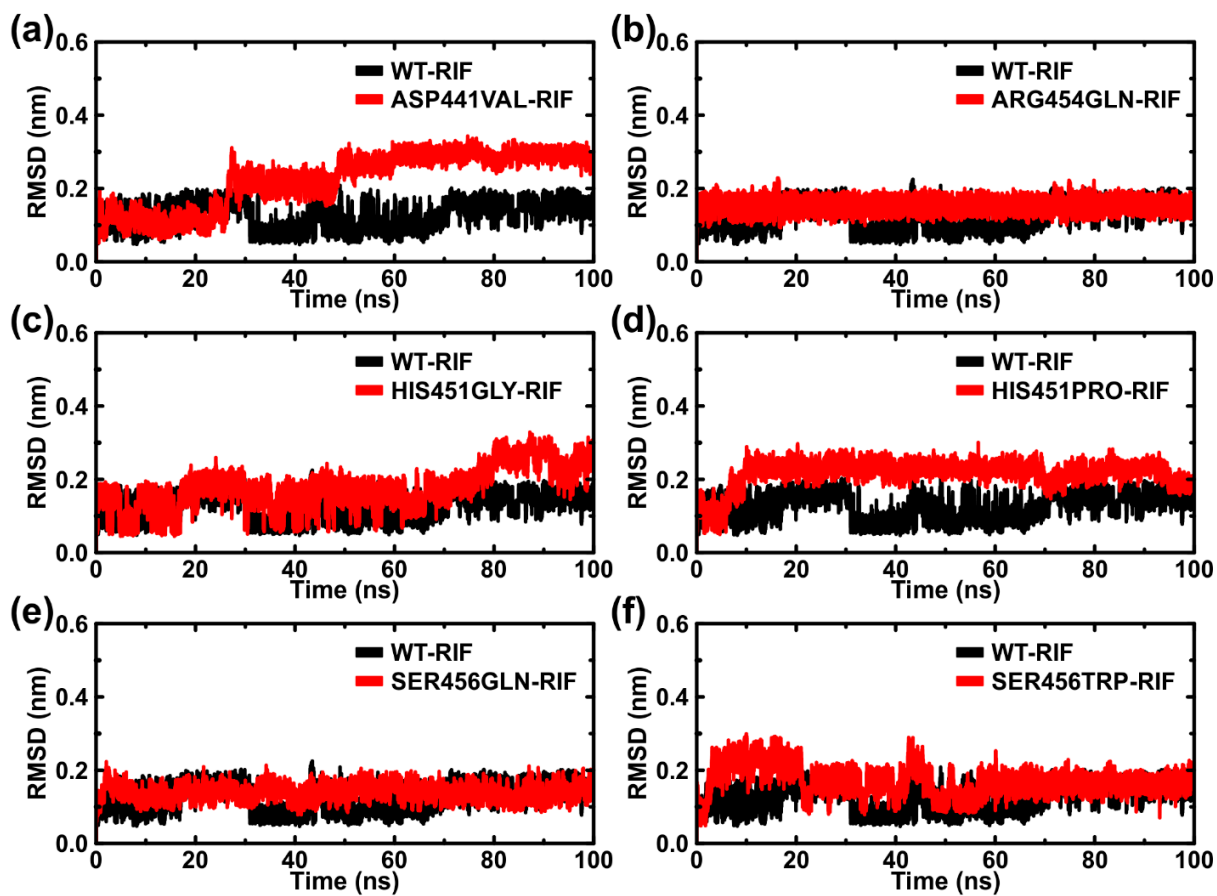

**Figure S5:** Time dependent RMSD evolution of rifampicin for each system. Color key: Black: WT, Red: Mutant.

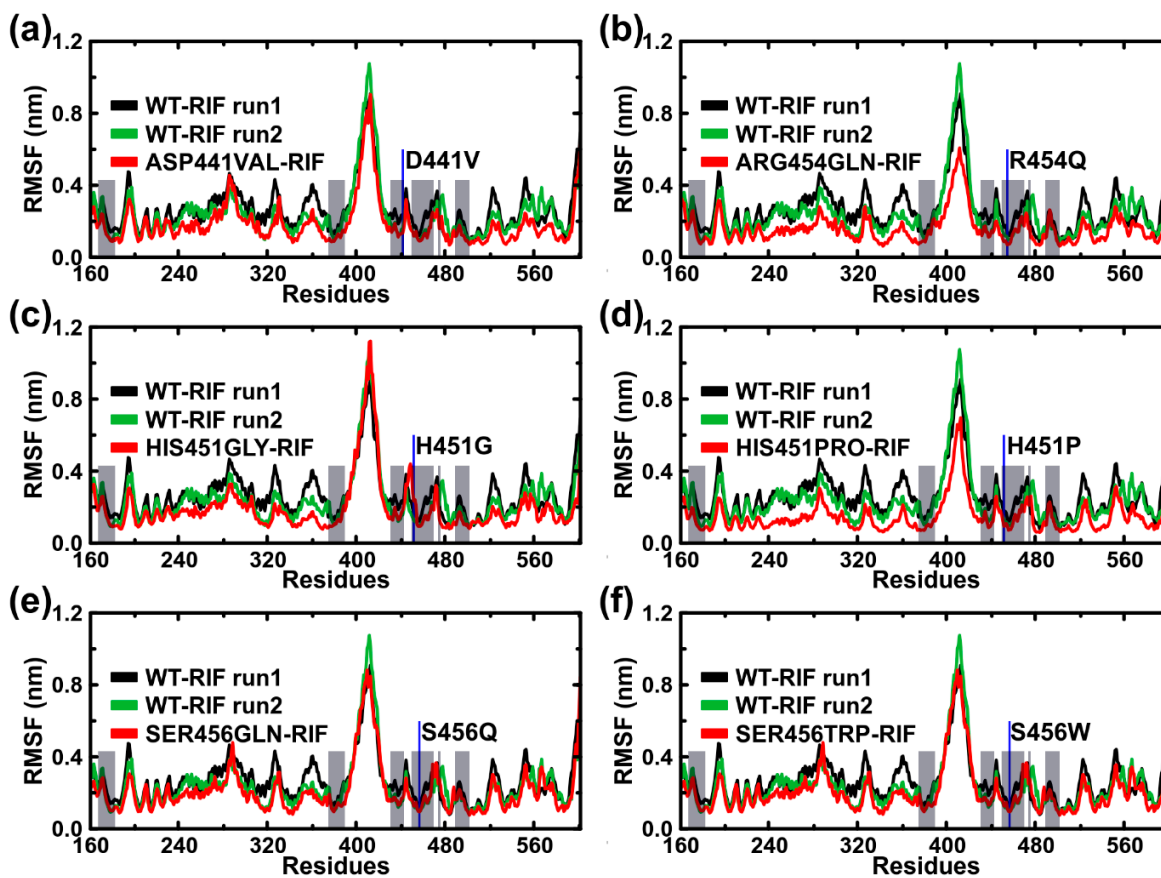

**Figure S6.** Average per residue RMS fluctuation of *rpoB* computed based on C- $\alpha$  atom positions. Ligand binding regions are shaded grey. Blue bar indicates the position of associated mutation. Color code: Black: WT, Red: Mutants.

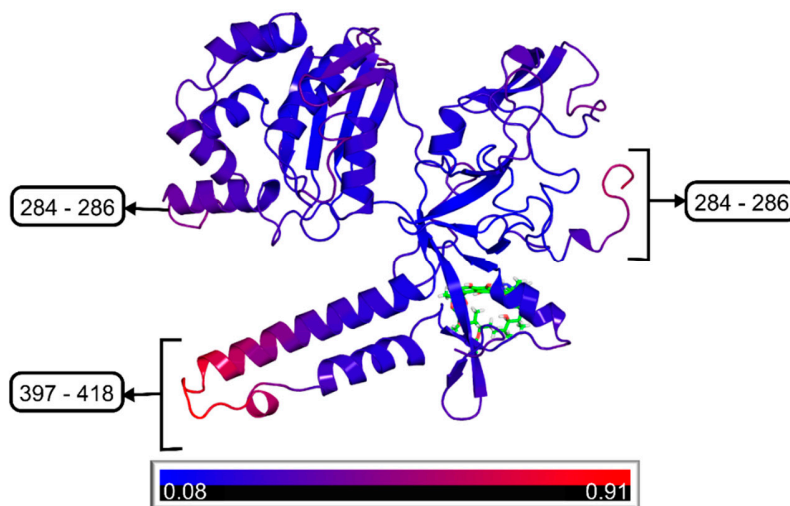

**Figure S7.** Structural mapping of the average per residue RMSF (calculated across all models). The color ranges from blue (low RMSF values) to red (high RMSF values).

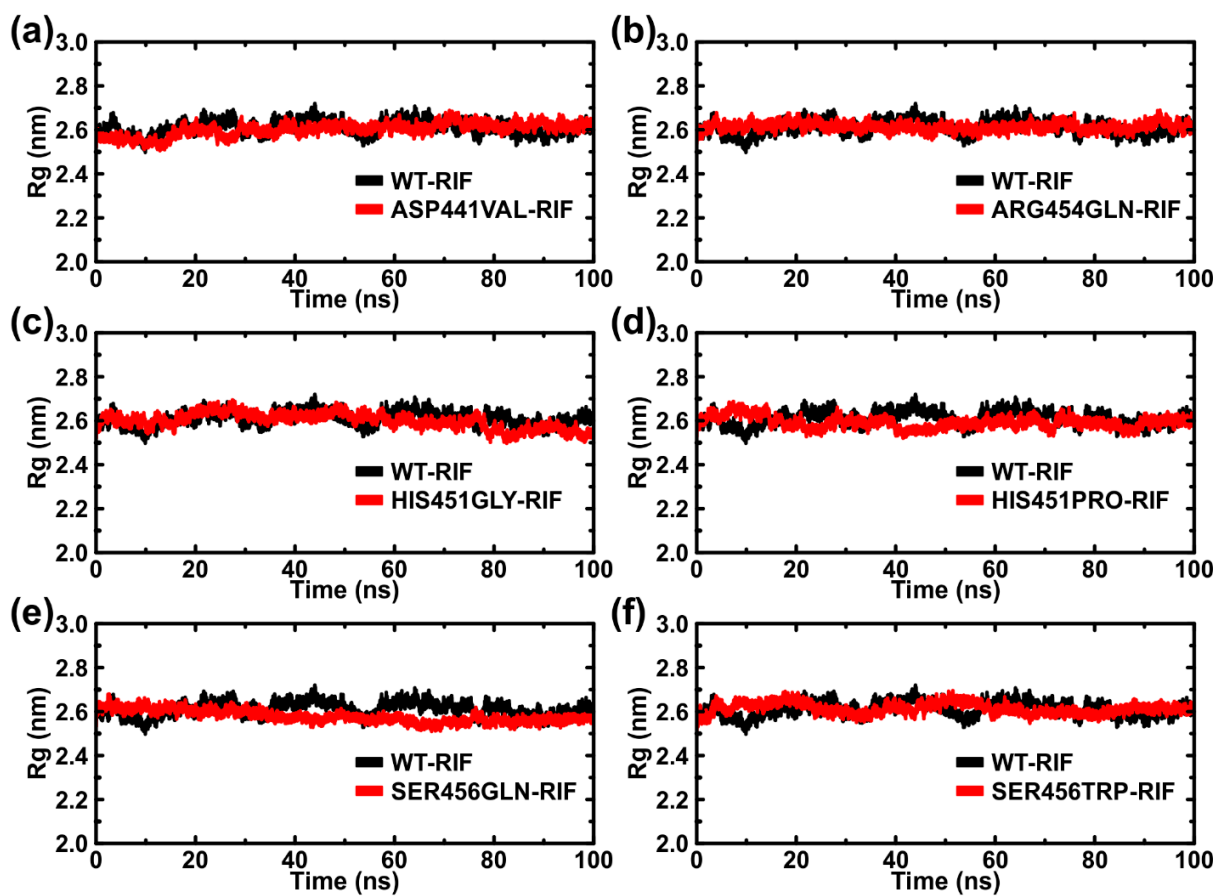

**Figure S8.** Time (ns) dependent  $R_g$  evolution of rpoB computed based on backbone atom positions. Color code: Black: WT, Red: Mutants.

**Table S3.** The proportion of variance captured by the top four principal components (PC1, PC2, PC3 and PC4). Generally, the first four PCs accounted for > 60% of the variance. Trace values obtained following the diagonalization of the covariance are also tabulated.

| System        | Percentage variance |         |         |        | Trace values              |
|---------------|---------------------|---------|---------|--------|---------------------------|
|               | PC1                 | PC2     | PC3     | PC4    | (Sum of 3969 eigenvalues) |
| WT-RIF run1   | 34.71 %             | 18.04 % | 14.92 % | 9.39 % | 113.69                    |
| WT-RIF run2   | 56.96%              | 14.14%  | 6.37%   | 4.15%  | 101.87                    |
| Asp441Val-RIF | 42.66 %             | 19.90 % | 6.01 %  | 4.44 % | 65.73                     |
| Arg454Gln-RIF | 25.78 %             | 21.81 % | 12.72 % | 8.43 % | 53.87                     |
| His451Gly-RIF | 49.20 %             | 20.86 % | 5.54 %  | 3.52 % | 78.94                     |
| His451Pro-RIF | 22.59 %             | 17.66 % | 12.20 % | 6.85 % | 39.58                     |
| Ser456Gln-RIF | 54.46 %             | 13.73 % | 6.24 %  | 3.88 % | 82.58                     |
| Ser456Trp-RIF | 38.75 %             | 19.46 % | 14.54 % | 4.52 % | 77.86                     |



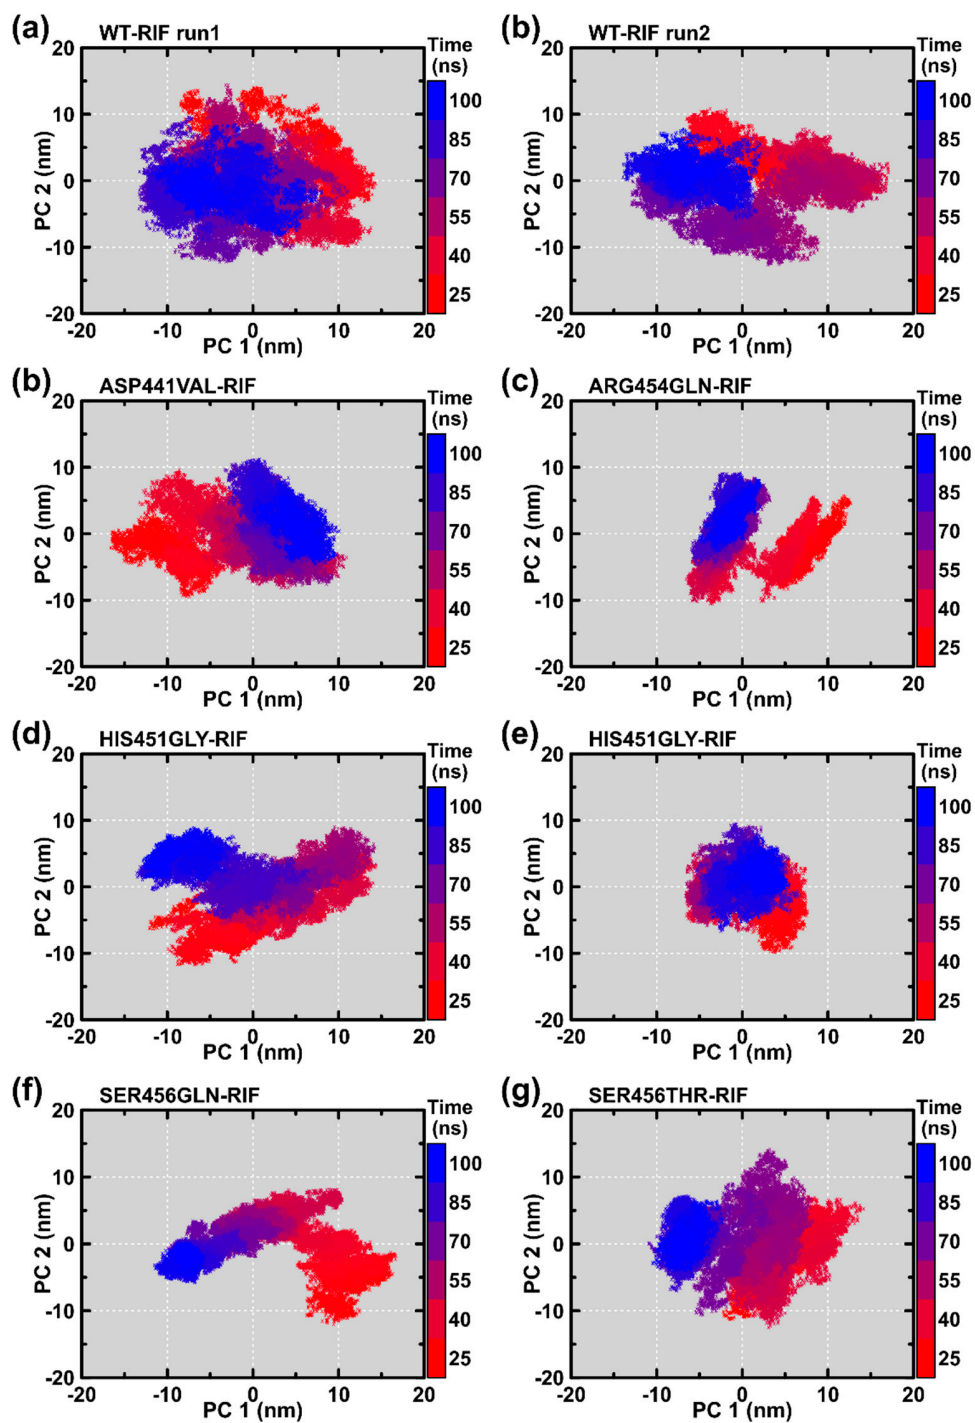

**Figure S9.** 2D projections of PC1 and PC2 as a function of time.

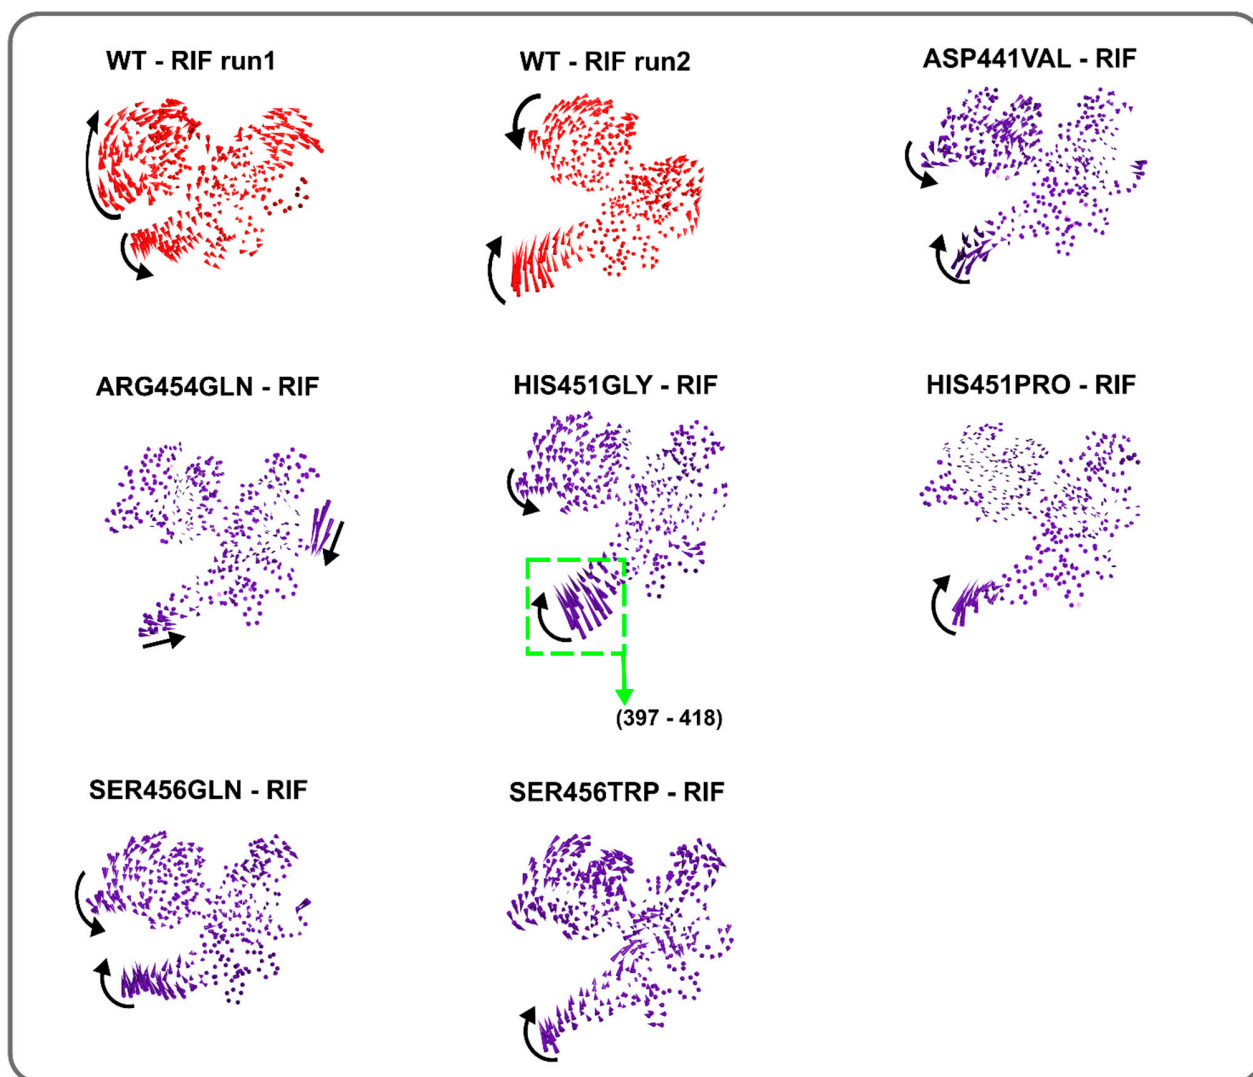

**Figure S10.** Porcupine plots displaying concerted atomic motion acquired during simulation. Arrows represent the general direction of dominant motion whereas the porcupine length represents the magnitude of motion.



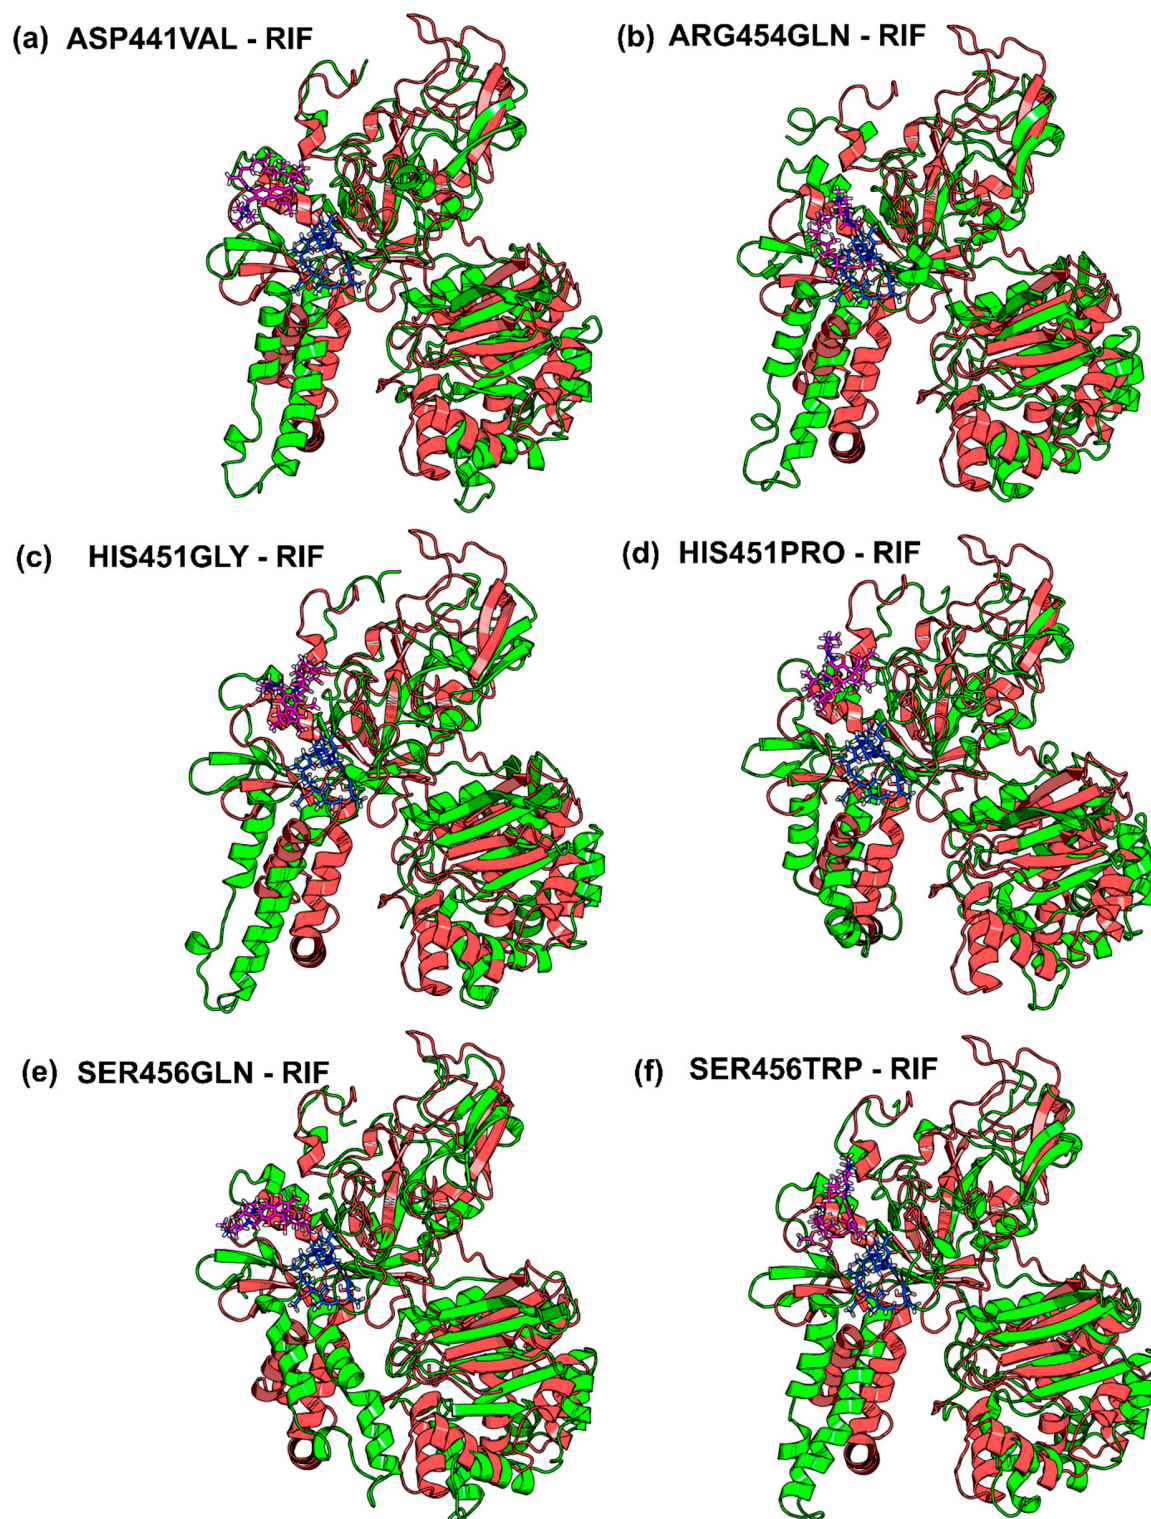

**Figure S11.** Structural comparison of dominant protein conformers extracted from low energy minimas on the conformational landscape (See **Figure 5**): WT (C1) versus mutants (C3, C4, C5, C6, C8, C9). Colour Key: WT: deep salmon, Mutants: green.

**Table S4.** Structural comparison of dominant protein conformers: WT (conformer: C1) versus mutants.

| Protein system | Dominant Conformer | RMSDs (nm) |
|----------------|--------------------|------------|
| arg454gln      | C3                 | 0.8010     |
| asp441val      | C4                 | 0.8270     |
| his451gly      | C5                 | 0.8455     |
| his451pro1     | C6                 | 0.9042     |
| ser456gln      | C8                 | 0.8937     |
| ser456trp      | C9                 | 0.8081     |

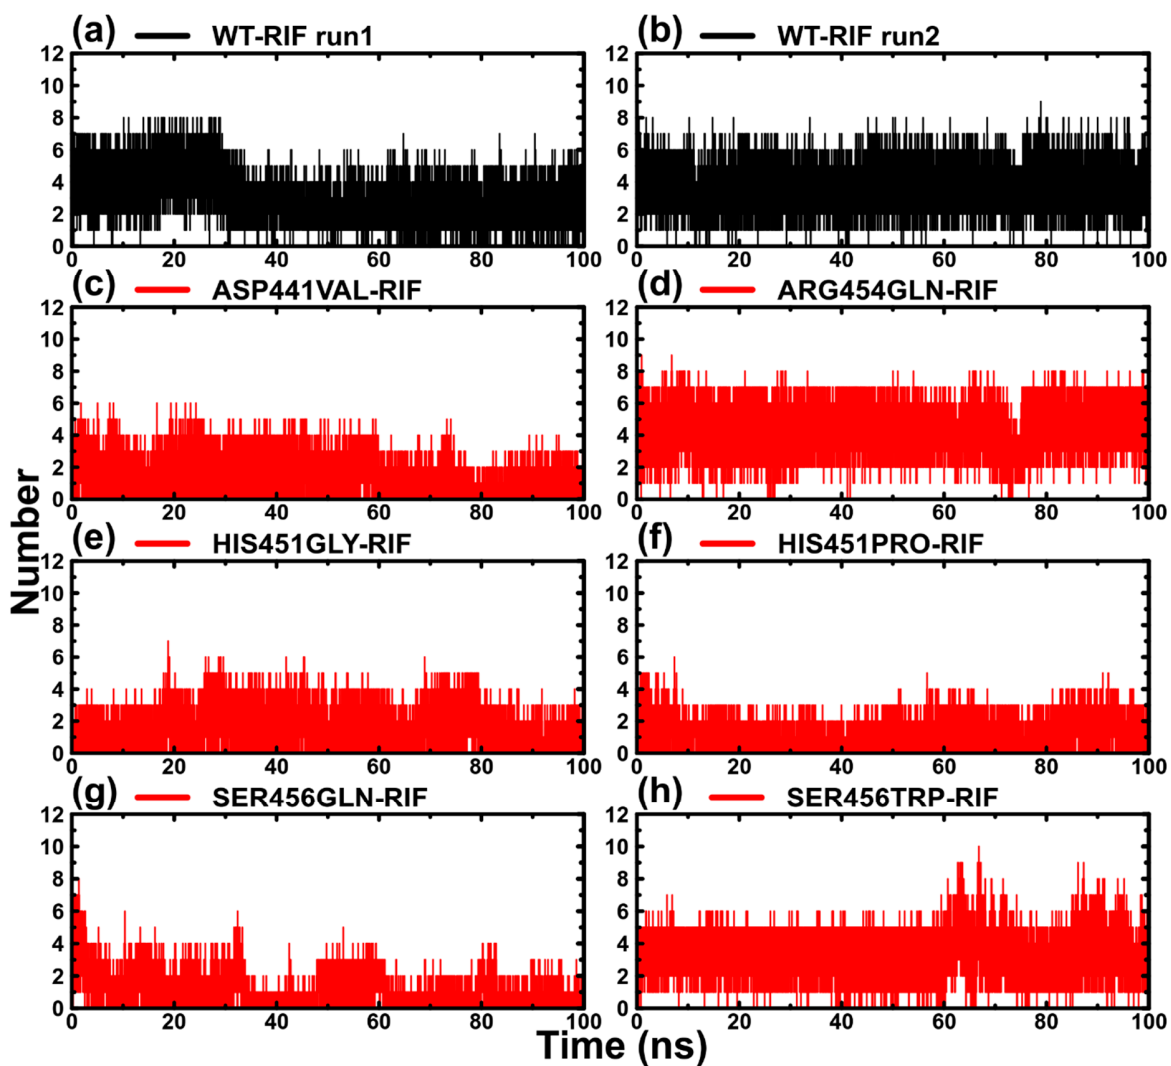

**Figure S12.** Time-dependent hydrogen bond numbers formed between rpoB and rifampicin during simulation.

(a) WT - RIF run1

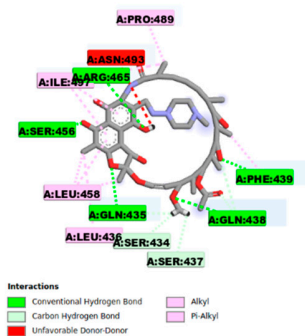

(a) WT - RIF run2

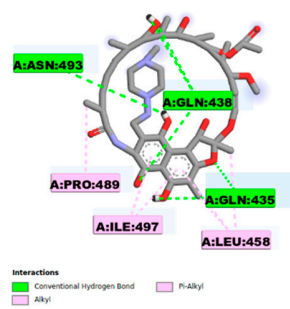

(b) ASP441VAL - RIF

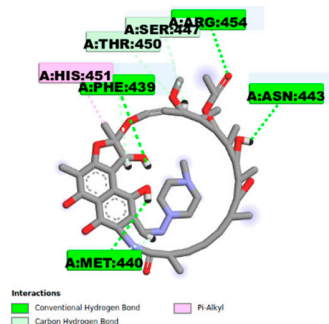

(c) ARG454GLN - RIF

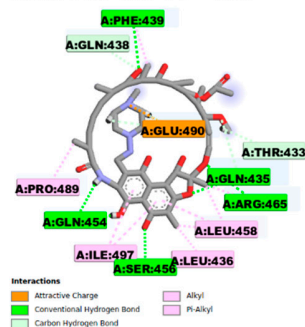

(d) HIS451GLY - RIF

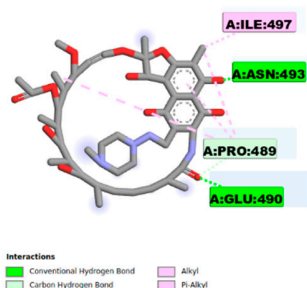

(e) HIS451PRO - RIF

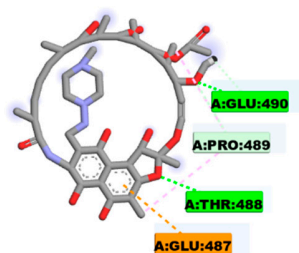

(f) SER456GLN - RIF

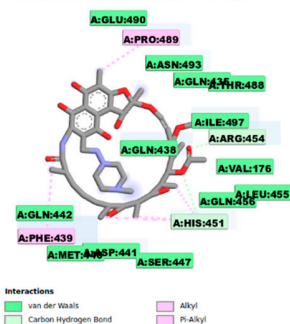

(g) SER456TRP - RIF

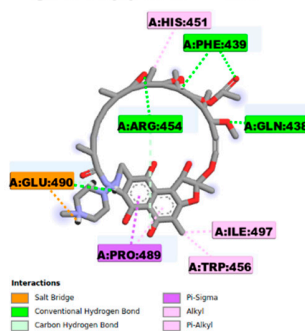

**Figure S13.** Protein-ligand interactions visualized using Discovery Studio Visualizer 4 (DS Visualizer) [4]. The representative structures were extracted from low energy minimas representing dominant protein conformations.

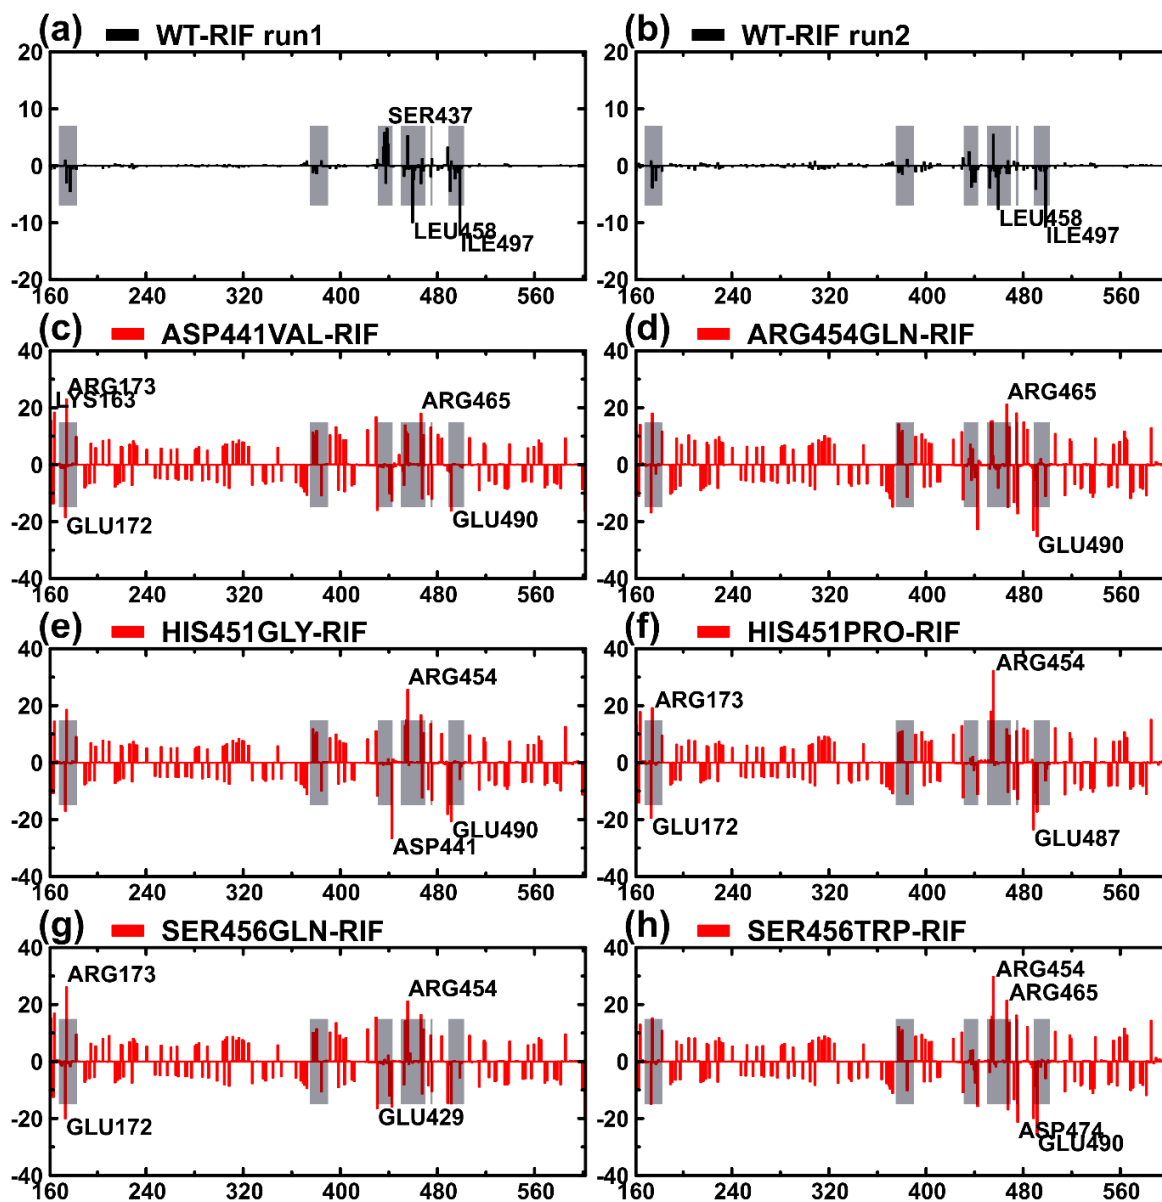

**Figure S14.** Bar plots showing per residue contribution to the total binding free energy for each model. Shaded regions indicate areas located within the ligand binding pocket.

**Table S5.** Tabulated summary of residues contributing substantially ( $> \pm 3\sigma$ ) to the total binding free energy in each model. -ve indicates that negative binding free energy value, while +ve indicates that a positive energy value was recorded.

| Protein       | Energy value<br>(+ve: positive,<br>-ve: negative) | Residue                                                        |
|---------------|---------------------------------------------------|----------------------------------------------------------------|
| WT-RIF run1   | +ve                                               | SER434, GLN435, SER437, GLN438, ARG454, GLU487                 |
|               | -ve                                               | VAL176, LEU458, PRO489, ILE497                                 |
| WT-RIF run2   | +ve                                               | ARG454                                                         |
|               | -ve                                               | ARG173, LEU436, GLN438, PHE439, HIS451, LEU458, PRO489, ILE497 |
| Arg441Val-RIF | +ve                                               | MET160, LYS163, ARG173, LYS428, ARG465                         |
|               | -ve                                               | ASP600, GLU490, GLU429, GLU172                                 |
| His451Pro-RIF | +ve                                               | LYS163, ARG173, LYS452, ARG453, ARG454                         |
|               | -ve                                               | GLU172, GLU487, GLU490, ASP600                                 |
| His451Gly-RIF | +ve                                               | ARG173, ARG454, ARG465                                         |
|               | -ve                                               | GLU172, ASP441, GLU487, GLU490, ASP600                         |
| Arg454Gln-RIF | +ve                                               | ARG173, ARG465, ARG473                                         |
|               | -ve                                               | ASP441, ASP474, GLU487, GLU490, ASP600                         |
| Ser456Gln-RIF | +ve                                               | MET160, LYS163, ARG173, LYS428, ARG454, ARG465                 |
|               | -ve                                               | GLU172, GLU429, ASP441, ASP600                                 |
| Ser456Trp-RIF | +ve                                               | ARG454, ARG465                                                 |
|               | -ve                                               | GLU466, ASP474, GLU487, GLU490, ASP600                         |



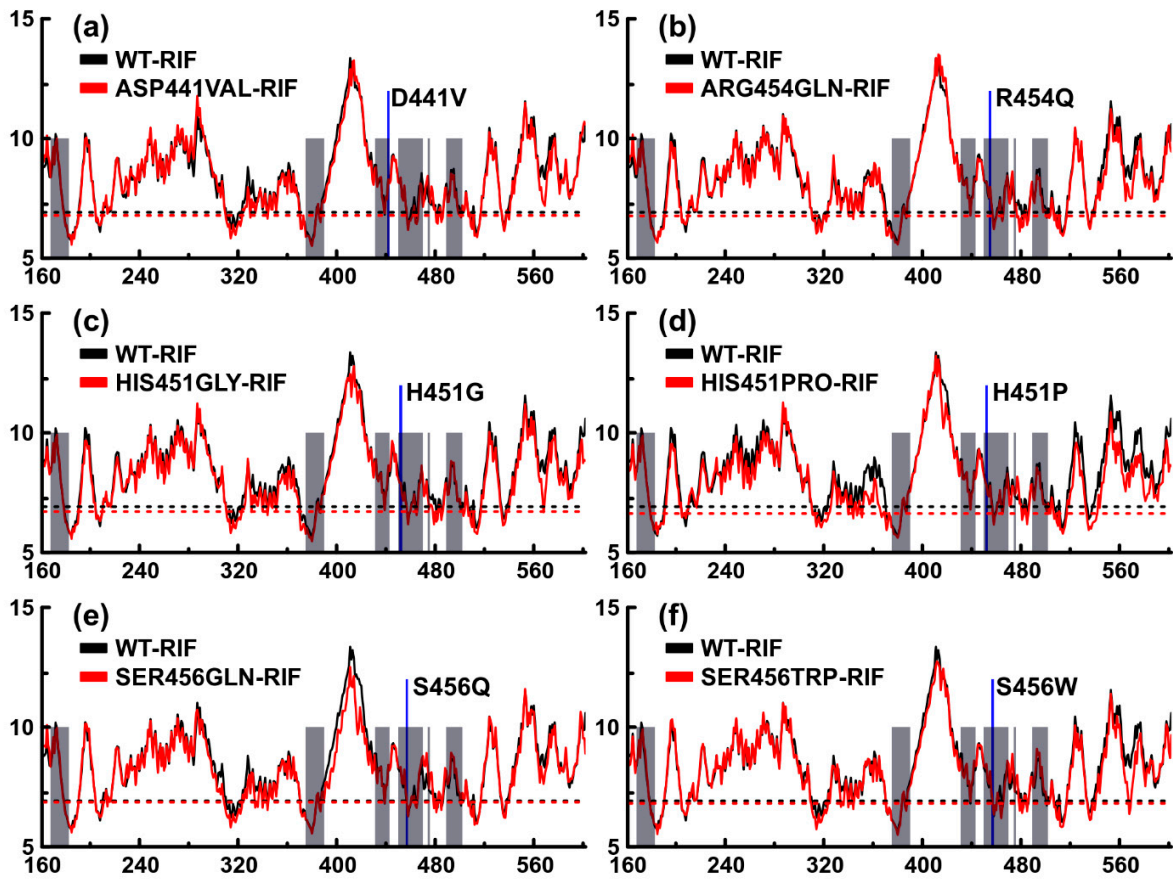

**Figure S15.** Per residue Average  $L$  plots. The WT-RIF highlights the average value from run1 and run2. Colour key: Black: Wildtype, Red: Mutants, Grey: residues within ligand binding region. Dashed lines indicate threshold values (1xSD from the mean) used to identify low average  $L$  regions (dips); WT-RIF: 6.91, Asp441Val-RIF: 6.79, Arg454Gln-RIF: 6.76, His451Gly-RIF: 6.71, His451Pro-RIF: 6.63, Ser456Gln-RIF: 6.87, Ser456Trp-RIF: 6.82.

**Table S6.** Average *BC* pairwise Pearson's correlation values computed among models. The WT-RIF input is computed from per residue average values of run1 and run2.

| System        | WT-RIF | Asp441Val-RIF | Arg454Gln-RIF | His451Gly-RIF | His451Pro-RIF | Ser456Gln-RIF | Ser456Trp-RIF |
|---------------|--------|---------------|---------------|---------------|---------------|---------------|---------------|
| WT-RIF        | 1      |               |               |               |               |               |               |
| Asp441Val-RIF | 0.87   | 1             |               |               |               |               |               |
| Arg454Gln-RIF | 0.88   | 0.87          | 1             |               |               |               |               |
| His451Gly-RIF | 0.89   | 0.91          | 0.94          | 1             |               |               |               |
| His451Pro-RIF | 0.83   | 0.84          | 0.85          | 0.90          | 1             |               |               |
| Ser456Gln-RIF | 0.88   | 0.87          | 0.83          | 0.87          | 0.80          | 1             |               |
| Ser456Trp-RIF | 0.86   | 0.94          | 0.84          | 0.89          | 0.82          | 0.87          | 1             |



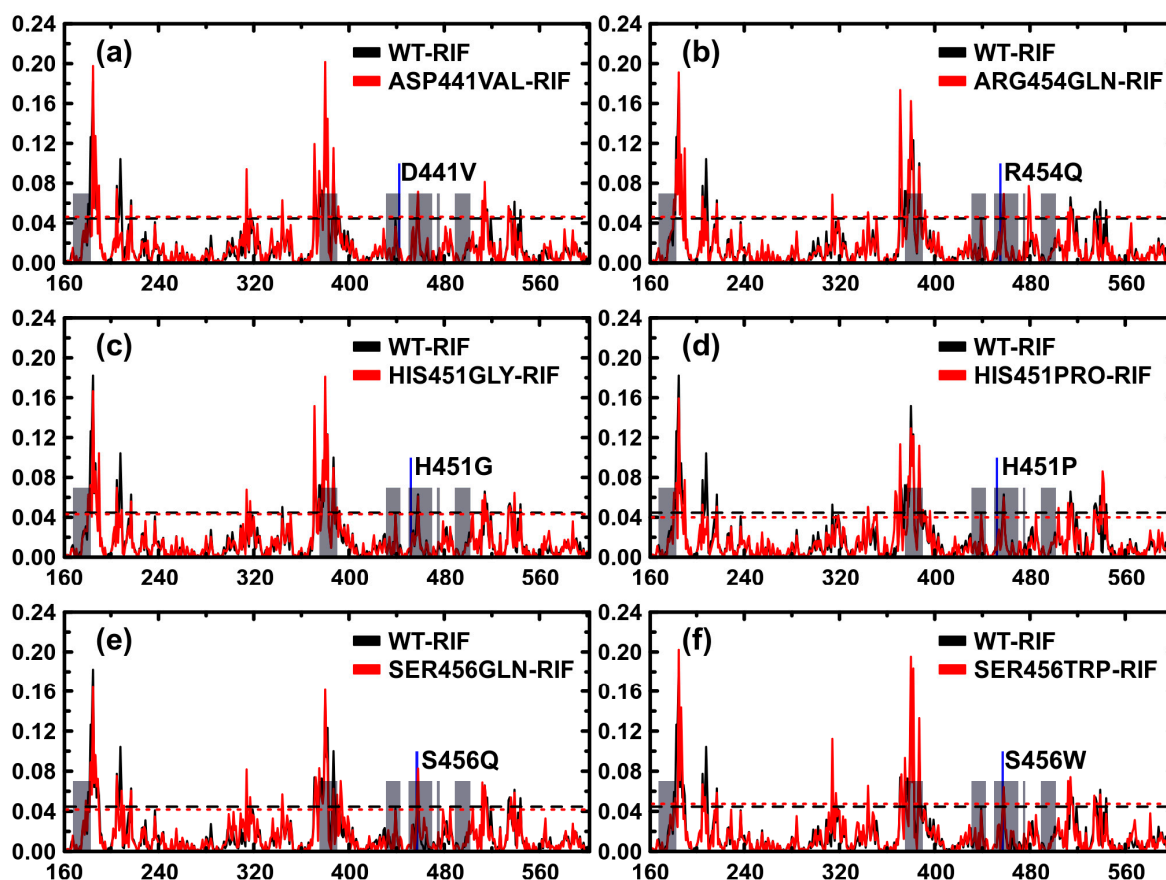

**Figure S16.** Plots of per residue average *BC*. WT-RIF highlights the average value from run1 and run2. Color code: Black: WT, Red: Mutants. Grey: residues within ligand binding region. Dashed lines indicate threshold values ( $2X_{sd}$ ) used to identify low average *L* regions (dips); WT-RIF: 0.045, Asp441Val-RIF: 0.046, Arg454Gln-RIF: 0.046, His451Gly-RIF: 0.043, His451Pro-RIF: 0.040, Ser456Gln-RIF: 0.042, Ser456Trp-RIF: 0.047.

**Table S7.** Residues possessing large average *BC* values (peaks) with respect to the WT systems (native representation).

| Model  | Residues                                                                                                                                                                 |
|--------|--------------------------------------------------------------------------------------------------------------------------------------------------------------------------|
| WT-RIF | LEU179-TYR186, ASP188, LYS203-SER207, ASP215, ASN317, ILE342, ASP369-ILE370, HIS372-THR380, LEU384-ASN387, ARG390, SER394, SER456, ILE512-THR514, ALA533, ASP537, ALA542 |

**Table S8.** Tabulated summary of residues that yielded large changes in average *BC* ( $\Delta BC$ ) due to mutations. Residues that yielded high average *BC* values are shown in bold. Residues unique to each model are underlined.

| Models    | Change   | Residues                                                                                                                                                                                      |
|-----------|----------|-----------------------------------------------------------------------------------------------------------------------------------------------------------------------------------------------|
| ASP441VAL | Positive | <b><u>LEU179</u></b> , <b>ARG181</b> , <b>SER182</b> , <b>VAL204</b> , <b>PRO206</b> , GLU213, VAL381, <b>GLN386</b>                                                                          |
|           | Negative | <b>VAL185</b> , GLY312, LYS315, <b>LEU378</b> , <b>THR380</b> , <b>ILE385</b> , <u>ILE389</u> , GLY510                                                                                        |
| SER456TRP | Positive | <b>ARG181</b> , <b>SER182</b> , <b>VAL204</b> , <b>PRO206</b> , <b>PHE373</b> , <b>GLY374</b> , <b>ASN375</b> , <b>ARG377</b>                                                                 |
|           | Negative | ASP188, GLY312, <b>ASP369</b> , <u>ILE370</u> , <b>ARG376</b> , <b>LEU378</b> , <u>ARG379</u> , <u>PRO477</u> , <u>SER478</u> , GLY510                                                        |
| SER456GLN | Positive | <b>ARG181</b> , <b>SER182</b> , <b>VAL204</b> , <b>PRO206</b> , <b>GLY374</b> , <b>ASN375</b> , <b>ARG377</b> , GLN386                                                                        |
|           | Negative | <b>ASP188</b> , GLY312, LYS315, <b>ASP369</b> , <b>ARG376</b> , <b>LEU378</b> , <b>THR380</b> , GLY510                                                                                        |
| ARG454GLN | Positive | <b>ARG181</b> , <b>SER182</b> , <b>VAL204</b> , <b>PRO206</b> , <b>PHE373</b> , <b>GLY374</b> , <b>ASN375</b> , <b>ARG377</b>                                                                 |
|           | Negative | <u>VAL365</u> , <u>GLU366</u> , <b>ARG376</b> , <b>ILE385</b> , GLY510, <u>HIS539</u> , <u>VAL540</u>                                                                                         |
| HIS451GLY | Positive | <b>ARG181</b> , <b>SER182</b> , <b>ASP188</b> , <b>PRO206</b> , GLU213, <b>ASP369</b> , <b>HIS372</b> , <b>ASN375</b> , <b>ARG377</b> , VAL381, <b>GLN386</b> , <u>ASN387</u> , <u>ARG390</u> |
|           | Negative | <u>PHE187</u> , <u>GLY209</u> , GLY312, LYS315, <u>ASP371</u> , <b>LEU378</b> , <u>GLN388</u> , <u>VAL391</u> , <u>GLY392</u> , <u>GLY461</u> , GLY510                                        |
| HIS451PRO | Positive | <b>ARG181</b> , <b>SER182</b> , <b>ASP188</b> , <b>PRO206</b> , <b>ASP369</b> , <b>HIS372</b> , <b>ASN375</b>                                                                                 |
|           | Negative | <b>VAL185</b> , GLY312, LYS315, <b>LEU378</b> , <b>THR380</b> , <b>ILE385</b> , GLY510                                                                                                        |

**A. (i) WT - RIF run1**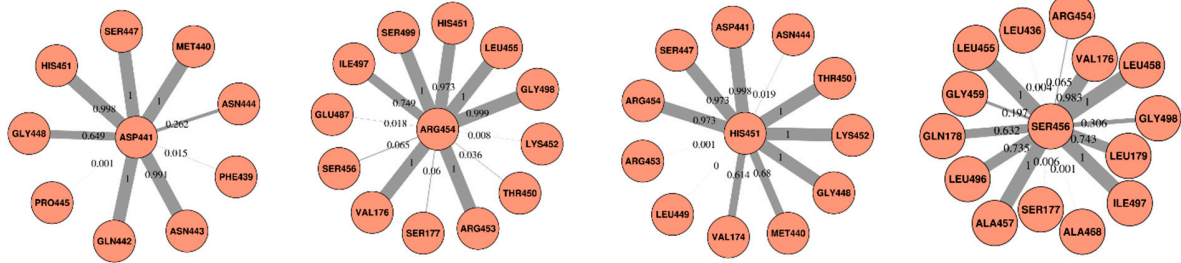**(ii) WT - RIF run2**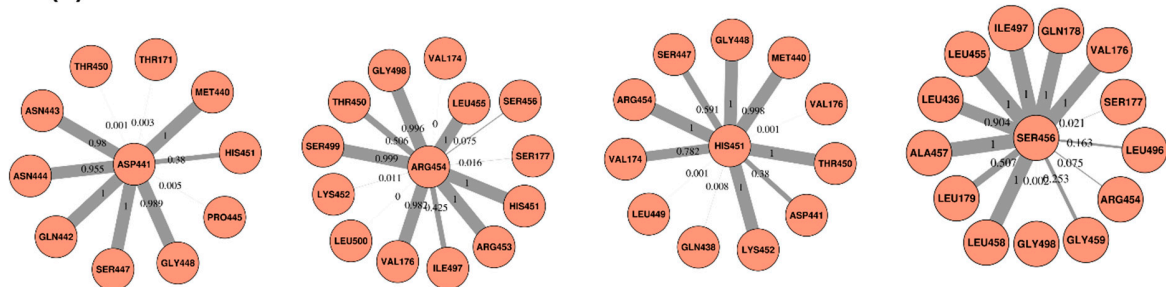**B.****(iii) ASP441VAL - RIF (iv) ARG454GLN - RIF (v) HIS451GLY - RIF (vi) HIS451PRO - RIF**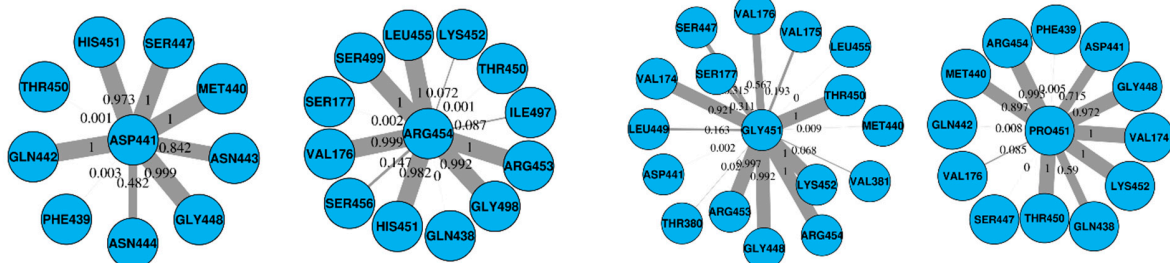**(vii) SER456GLN - RIF (viii) SER456TRP - RIF**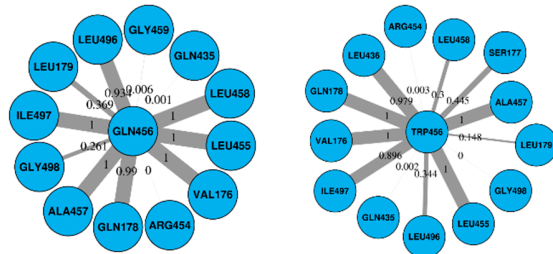**Figure S17.** Ensemble averaged residue contact map of the WT and mutated models.

**Supplementary file S1.** RpoB mutations retrieved from MUBII-TB-DB database.

**Supplementary file S2:** RpoB mutations prioritized in this study.

## REFERENCES

1. Lin, W.; Mandal, S.; Degen, D.; Liu, Y.; Ebright, Y.W.; Li, S.; Feng, Y.; Zhang, Y.; Mandal, S.; Jiang, Y.; et al. Structural Basis of Mycobacterium tuberculosis Transcription and Transcription Inhibition. *Mol. Cell* **2017**, doi:10.1016/j.molcel.2017.03.001.
2. Molodtsov, V.; Scharf, N.T.; Stefan, M.A.; Garcia, G.A.; Murakami, K.S. Structural basis for rifamycin resistance of bacterial RNA polymerase by the three most clinically important RpoB mutations found in Mycobacterium tuberculosis. *Mol. Microbiol.* **2017**, doi:10.1111/mmi.13606.
3. Campbell, E.A.; Korzheva, N.; Mustaev, A.; Murakami, K.; Nair, S.; Goldfarb, A.; Darst, S.A. Structural Mechanism for Rifampicin Inhibition of Bacterial RNA Polymerase. *Cell* **2001**, *104*, 901–912, doi:10.1016/S0092-8674(01)00286-0.
4. BIOVA BIOVIA Discovery Studio | Predictive Modeling & Science Simulation Software App Available online: <http://accelrys.com/products/collaborative-science/biovia-discovery-studio/> (accessed on May 27, 2016).
