# Supplementary material for: The Structural Basis of Mycobacterium tuberculosis RpoB Drug-Resistant Clinical Mutations on Rifampicin Drug Binding
Source: Molecules. 2022 Jan 28;27(3):885. doi: 10.3390/molecules27030885 (PMC8839920; doi:10.3390/molecules27030885)
Supplement: Supplementary file 1 [file molecules-27-00885-s001.zip › rpoB_Molecules_Supplementary File S1.xlsx]

## Sheet: Sheet1
Rv0667	1	RIF	rpoB	Heep M AAC 2000	GTC/TTC	146	146	Val/Phe	Published 2003	6 isolates from Japan for which MICs of rifampin were elevated but with wild-type sequence in the rpoB cluster region. N=6	Japan	Sequencing	Whole gene
Rv0667	2	RIF	rpoB	Taniguchi H FEMS Micro 1996	GCG/GTG	381	381	Ala/Val	Published 1997	39 clinical isolates (including MDR-TB strains) from Koga Hospital, Nougata central hospital, and Fukuoka-Higashi hospital. N=39	Japan	Sequencing	Whole gene
Rv0667	3	RIF	rpoB	Cavusoglu C JCM 2002	CAG/CAT	490	490	Gln/His	Published 2002	41 RIF-resistant isolates from Reion Tuberculosis Laboratory and Ege University Mycobacteriology Laboratory. N=41	Turkey	Line probe assay, Sequencing	RRDR
Rv0667	4	RIF	rpoB	Schilke K IntJTubLungDis 1999	GAG/GCG	504	504	Glu/Ala	Published 1999	87 MDR strains from 12 hospitals in Southern African regions + 13 RIF-resistant strains of M. africanum + 3 RIF-resistant strains of M. tuberculosis from Sierra Leone and Uganda + 2 RIF-resistant strains of M. tuberculosis from Namibia. N=105	South Africa	Sequencing	RRDR
Rv0667	5	RIF	rpoB	Heym B Lancet 1994	TTC/TTG	505	505	Phe /Leu	1991-1992	39 drug-resistant isolates analyzed: 16 strains resistant to H, 1 control - fully susceptible, 15 strains from other French hospitals but where susceptibility testing was done at the Pitie-Salpetriere lab. Taken from survey from 1991-1992 of drug resistance among isolates received for testing at Pietie-Salpetriere Hospital. N=39	La Reunion	PCR-SSCP
Rv0667	6	RIF	rpoB	Stavrum R PlosOne 2009	TTC/TTA	505	505	Phe /Leu	Published 2009		India	Sequencing	Whole gene
Rv0667	7	RIF	rpoB	Wang Q JProtRes 2007	TTC/TCC	505	505	Phe/Ser	Published 1997		China	Sequencing	Whole gene
Rv0667	8	RIF	rpoB	Bahrmand AR JCM 2009	GGC/AGC	507	507	Gly/Ser	2005-2006	286 isolates from sputa of patients with active pulmonary TB from the southern border of Iran, Zabol province, Afghanistan border.	Iran	Sequencing	411bp fragment of rpoB
Rv0667	9	RIF	rpoB	Kim BJ JCM 1997	GGC/GAC	507	507	Gly/Asp	Published 1997	Clinical isolates, both RIF-R (n=32) and RIF-S (n=26) from different patients. Total N=58	South Korea	PCR-SSCP, Sequencing	RRDR
Rv0667	10	RIF	rpoB	Bahrmand AR JCM 2009	GGC/GAT	507	507	Gly/Asp	2005-2006	286 isolates from sputa of patients with active pulmonary TB from the southern border of Iran, Zabol province, Afghanistan border.	Iran	Sequencing	411bp fragment of rpoB
Rv0667	11	RIF	rpoB	Secondary Publication: Ramaswamy S Musser JM Tubercle lung Dis 1998	del GGC ACC	507	507-508	del Gly Thr
Rv0667	12	RIF	rpoB	Bahrmand AR JCM 2009	ACC/CAC	508	508	Thr/His	2005-2006	286 isolates from sputa of patients with active pulmonary TB from the southern border of Iran, Zabol province, Afghanistan border.	Iran	Sequencing	411bp fragment of rpoB
Rv0667	13	RIF	rpoB	Bahrmand AR JCM 2009	ACC/CCC	508	508	Thr/Pro	2005-2006	286 isolates from sputa of patients with active pulmonary TB from the southern border of Iran, Zabol province, Afghanistan border.	Iran	Sequencing	411bp fragment of rpoB
Rv0667	14	RIF	rpoB	Bahrmand AR JCM 2009	ACC/GCC	508	508	Thr/Ala	2005-2006	286 isolates from sputa of patients with active pulmonary TB from the southern border of Iran, Zabol province, Afghanistan border.	Iran	Sequencing	411bp fragment of rpoB
Rv0667	15	RIF	rpoB	Mani C JCM 2001	ACC/AGC	508	508	Thr/Ser	Published 2001	RIF-R (n=44) and RIF-S (n=6) isolates from 50 patients. Total N=50	India	Sequencing	RRDR
Rv0667	16	RIF	rpoB	Matsiota-Bernard P JCM 1998	ACC/GCT	508	508	Thr/Ser	1995-1996	RIF-R clinical isolates. N=17	Greece	Line probe assay, Sequencing	RRDR
Rv0667	17	RIF	rpoB	Zenteno-Cuevas R MemInstOswaldCruz 2009	AGC/CAG	509	509	Ser/Gln	2007		Mexico	Sequencing	RRDR
Rv0667	18	RIF	rpoB	Williams D AAC 1994	AGC/ACC	509	509	Ser/Thr	Published 1994	110 RIF-resistant and 10 RIF-susceptible strains from different geographic regions across the world. N=120	Canada	Sequencing	RRDR
Rv0667	19	RIF	rpoB	Sekiguchi J JCM 2007 Jan	AGC/AGG	509	509	Ser/Arg	Published 2007	105 and 33 clinical isolates were obtained from patients with pulmonary tuberculosis in Japan and Poland, respectively. N=138	Japan	Sequencing	RRDR
Rv0667	20	RIF	rpoB	Zenteno-Cuevas R MemInstOswaldCruz 2009	CAG/AAG	510	510	Gln/Lys	2007		Mexico	Sequencing	RRDR
Rv0667	21	RIF	rpoB	Sajduda A JCM 2004	CAG/CAC	510	510	Gln/His	2000	105 drug resistant strains (83 INH-resistant and 64 RMP-resistant) + 8 controls (H37Rv-susceptible, 4 INH-sensitive, 3 RMP-sensitive); Isolated from TB patients during second national survey of drug resistance in Poland; provided by National Tuberculosis Reference Laboratory in Warsaw. N=113	Poland	real-time sequencing FRET	RRDR
Rv0667	22	RIF	rpoB	Kapur V JCM 1994	CTG/CCG	511	511	Leu/Pro	Published 1994	Clinical isolates, both RIF-R (n=121) and RIF-S (n=7); some of them had been studied previously. Total N=128	USA	Sequencing	Whole gene
Rv0667	23	RIF	rpoB	Kapur V JCM 1994	CTG/CGG	511	511	Leu/Arg	Published 1994	Clinical isolates, both RIF-R (n=121) and RIF-S (n=7); some of them had been studied previously. Total N=128	USA	Sequencing	Whole gene
Rv0667	24	RIF	rpoB	Siddiqi N AAC 2002	CTG/GTG	511	511	Leu/Val	1995-1998	126 clinical isolates that were drug resistant. N=126	India	Sequencing	RRDR
Rv0667	25	RIF	rpoB	Kapur V JCM 1994	AGC/ACC	512	512	Ser/Thr	Published 1994	Clinical isolates, both RIF-R (n=121) and RIF-S (n=7); some of them had been studied previously. Total N=128	USA	Sequencing	Whole gene
Rv0667	26	RIF	rpoB	Sajduda A JCM 2004	AGC/ATC	512	512	Ser/Ile	2001	105 drug resistant strains (83 INH-resistant and 64 RMP-resistant) + 8 controls (H37Rv-susceptible, 4 INH-sensitive, 3 RMP-sensitive); Isolated from TB patients during second national survey of drug resistance in Poland; provided by National Tuberculosis Reference Laboratory in Warsaw. N=113	Poland	real-time sequencing FRET	RRDR
Rv0667	27	RIF	rpoB	Secondary Publication: Ramaswamy S Musser JM Tubercle lung Dis 1998	AGC/CGC	512	512	Ser/Arg
Rv0667	28	RIF	rpoB	Chan RCY JAC 2007	AGC/GGC	512	512	Ser/Gly	1994-2004	Consecutive isolates that exhibited resistance to one or more drugs. Grantham Hospital and Public Health Laboratory of Hong Kong	Hong Kong	PCR-SSCP, Sequencing	RRDR
Rv0667	29	RIF	rpoB	Bahrmand AR JCM 2009	CAA/TAA	513	513	Gln/STOP	2005-2006	286 isolates from sputa of patients with active pulmonary TB from the southern border of Iran, Zabol province, Afghanistan border.	Iran	Sequencing	411bp fragment of rpoB
Rv0667	30	RIF	rpoB	Bahrmand AR JCM 2009	CAA/AAT	513	513	Gly/Asn	2005-2006	286 isolates from sputa of patients with active pulmonary TB from the southern border of Iran, Zabol province, Afghanistan border.	Iran	Sequencing	411bp fragment of rpoB
Rv0667	31	RIF	rpoB	Kapur V JCM 1994	CAA/CTA	513	513	Gln/Leu	Published 1994	Clinical isolates, both RIF-R (n=121) and RIF-S (n=7); some of them had been studied previously. Total N=128	USA	Sequencing	Whole gene
Rv0667	32	RIF	rpoB	Kapur V JCM 1994	CAA/AAA	513	513	Gln/Lys	Published 1994	Clinical isolates, both RIF-R (n=121) and RIF-S (n=7); some of them had been studied previously. Total N=128	USA	Sequencing	Whole gene
Rv0667	33	RIF	rpoB	Prammananan T CMI 2008	CAA/GAA	513	513	Gln/Glu	2003-2005		Thailand	Sequencing	Whole gene
Rv0667	34	RIF	rpoB	Kim BJ JCM 1997	CAA/CCA	513	513	Gln/Pro	Published 1997	Clinical isolates, both RIF-R (n=32) and RIF-S (n=26) from different patients. Total N=58	South Korea	Sequencing	RRDR
Rv0667	35	RIF	rpoB	Valim A JCM 2000	CAA/CAC	513	513	Gln/His
Rv0667	36	RIF	rpoB	Secondary Publication: O'Sullivan DM JAntiChemo 2005	CAA/CGA	513	513	Gln/Arg
Rv0667	37	RIF	rpoB	Kapur V JCM 1994	ins TTC	513	513-514	ins Phe	Published 1994	Clinical isolates, both RIF-R (n=121) and RIF-S (n=7); some of them had been studied previously. Total N=128	USA	Sequencing	Whole gene
Rv0667	38	RIF	rpoB	Kapur V JCM 1994	ins TTC ATG	513	513-514	ins Phe Met	Published 1994	Clinical isolates, both RIF-R (n=121) and RIF-S (n=7); some of them had been studied previously. Total N=128	USA	Sequencing	Whole gene
Rv0667	39	RIF	rpoB	Secondary Publication: Ramaswamy S Musser JM Tubercle lung Dis 1998	del CAA TTC	513	513-514	del Gln Phe
Rv0667	40	RIF	rpoB	Secondary Publication: Ramaswamy S Musser JM Tubercle lung Dis 1998	del AA TTC ATG G	513	513-516	Gln/His and del Phe Met
Rv0667	41	RIF	rpoB	Valim A JCM 2000	del TTC	514	514	del Phe	1996-1998	100 isolates from different regions of Brazil: 26 samples (25 RIF-resistant; 1 RIF-susceptible) from Rio de Janeiro. N=100	Brazil	Sequencing	RRDR
Rv0667	42	RIF	rpoB	Taniguchi H FEMS Micro 1996	TTC/TTG	514	514	Phe/Leu	Published 1996	39 clinical isolates (including MDR-TB strains) from Koga Hospital, Nougata central hospital, and Fukuoka-Higashi hospital. N=39	Japan	Sequencing	Whole gene
Rv0667	43	RIF	rpoB	Valim A JCM 2000	TTC/GTC	514	514	Phe/Val	1996-1998	100 isolates from different regions of Brazil: 26 samples (25 RIF-resistant; 1 RIF-susceptible) from Rio de Janeiro. N=100	Brazil	Sequencing	RRDR
Rv0667	44	RIF	rpoB	Cavusoglu C JCM 2002	ins CGG	514	514-515	ins Arg	Published 2002	41 RIF-resistant isolates from Reion Tuberculosis Laboratory and Ege University Mycobacteriology Laboratory. N=41	Turkey	Line probe assay, Sequencing	RRDR
Rv0667	45	RIF	rpoB	Lipin MY CMI 2007	del C AT	514	514-515	Phe/Leu and del Met	1998-2001	MDR-TB isolates from pulmonary TB patients. Most patients were male (92%); mean age 43yrs; none were co-infected with HIV. N=217	Russia	Sequencing	RRDR
Rv0667	46	RIF	rpoB	Valim A JCM 2000	del TTC ATG GAC	514	514-516	del Phe Met Asp	1996-1998	100 isolates from different regions of Brazil: 26 samples (25 RIF-resistant; 1 RIF-susceptible) from Rio de Janeiro. N=100	Brazil	Sequencing	RRDR
Rv0667	47	RIF	rpoB	Hillemann D Int J Tuberc Lung Dis 2005	ins TTC	515	515	ins Phe	2004	92 MDR (73 also resistant to EMB; 89 to SM; 40 to PZA; 31 to PTH); 50 single INH but RMP-susceptible (16 also resistant to EMB; 44 to SM; 7 to PZA; 12 to PTH); 10 fully susceptible strains that were randomly selected from 42 susceptible strains. N=152	Kazakhstan, Germany	real-time sequencing FRET	RRDR
Rv0667	48	RIF	rpoB	Sajduda A JCM 2004	ATG/ATT	515	515	Met/Ile	2003	105 drug resistant strains (83 INH-resistant and 64 RMP-resistant) + 8 controls (H37Rv-susceptible, 4 INH-sensitive, 3 RMP-sensitive); Isolated from TB patients during second national survey of drug resistance in Poland; provided by National Tuberculosis Reference Laboratory in Warsaw. N=113	Poland	real-time sequencing FRET	RRDR
Rv0667	49	RIF	rpoB	Secondary Publication: Ramaswamy S Musser JM Tubercle lung Dis 1998	ATG/ATA	515	515	Met/Ile
Rv0667	50	RIF	rpoB	Valim A JCM 2000	del ATG GAC CAG AAC	515	515-518	del Met Asp Gln Asn	1996-1998	100 isolates from different regions of Brazil: 26 samples (25 RIF-resistant; 1 RIF-susceptible) from Rio de Janeiro. N=100	Brazil	Sequencing	RRDR
Rv0667	51	RIF	rpoB	Schilke K IntJTubLungDis 1999	GAC/AAC	516	516	Asp/Asn	Published 1999	87 MDR strains from 12 hospitals in Southern African regions + 13 RIF-resistant strains of M. africanum + 3 RIF-resistant strains of M. tuberculosis from Sierra Leone and Uganda + 2 RIF-resistant strains of M. tuberculosis from Namibia. N=105	South Africa	Sequencing	RRDR
Rv0667	52	RIF	rpoB	Bahrmand AR JCM 2009	GAC/CAC	516	516	Asp/His	2005-2006	286 isolates from sputa of patients with active pulmonary TB from the southern border of Iran, Zabol province, Afghanistan border.	Iran	Sequencing	411bp fragment of rpoB
Rv0667	53	RIF	rpoB	Kapur V JCM 1994	GAC/GTC	516	516	Asp/Val	Published 1994	Clinical isolates, both RIF-R (n=121) and RIF-S (n=7); some of them had been studied previously. Total N=128	USA	Sequencing	Whole gene
Rv0667	54	RIF	rpoB	Kapur V JCM 1994	GAC/GAG	516	516	Asp/Glu	Published 1994	Clinical isolates, both RIF-R (n=121) and RIF-S (n=7); some of them had been studied previously. Total N=128	USA	Sequencing	Whole gene
Rv0667	55	RIF	rpoB	Hillemann D Int J Tuberc Lung Dis 2005	GAC/GGC	516	516	Asp/Gly	2004	92 MDR (73 also resistant to EMB; 89 to SM; 40 to PZA; 31 to PTH); 50 single INH but RMP-susceptible (16 also resistant to EMB; 44 to SM; 7 to PZA; 12 to PTH); 10 fully susceptible strains that were randomly selected from 42 susceptible strains. N=152	Kazakhstan, Germany	real-time sequencing FRET	RRDR
Rv0667	56	RIF	rpoB	Secondary Publication: Ramaswamy S Musser JM Tubercle lung Dis 1998	GAC/GCC	516	516	Asp/Ala
Rv0667	57	RIF	rpoB	Sajduda A JCM 2004	GAC/GTG	516	516	Asp/Val	2004	105 drug resistant strains (83 INH-resistant and 64 RMP-resistant) + 8 controls (H37Rv-susceptible, 4 INH-sensitive, 3 RMP-sensitive); Isolated from TB patients during second national survey of drug resistance in Poland; provided by National Tuberculosis Reference Laboratory in Warsaw. N=113	Poland	real-time sequencing FRET	RRDR
Rv0667	58	RIF	rpoB	Kapur V JCM 1994	GAC/TAC	516	516	Asp/Tyr	Published 1994	Clinical isolates, both RIF-R (n=121) and RIF-S (n=7); some of them had been studied previously. Total N=128	USA	Sequencing	Whole gene
Rv0667	59	RIF	rpoB	Hillemann D Int J Tuberc Lung Dis 2005	GAC/TTC	516	516	Asp/Phe	2004	92 MDR (73 also resistant to EMB; 89 to SM; 40 to PZA; 31 to PTH); 50 single INH but RMP-susceptible (16 also resistant to EMB; 44 to SM; 7 to PZA; 12 to PTH); 10 fully susceptible strains that were randomly selected from 42 susceptible strains. N=152	Kazakhstan, Germany	real-time sequencing FRET	RRDR
Rv0667	60	RIF	rpoB	Kapur V JCM 1994	del GAC CAG	516	516-517	del Asp Gln	Published 1994	Clinical isolates, both RIF-R (n=121) and RIF-S (n=7); some of them had been studied previously. Total N=128	USA	Sequencing	Whole gene
Rv0667	61	RIF	rpoB	Xueqiong W MolBiotech 2009	GAC/CAC	517	517	Gln/His	2002-2005		China	Sequencing	RRDR
Rv0667	62	RIF	rpoB	Mani C JCM 2001	del GAC	517	517	del Gln	Published 2001	RIF-R (n=44) and RIF-S (n=6) isolates from 50 patients. Total N=50	India	Sequencing	RRDR
Rv0667	63	RIF	rpoB	Sajduda A JCM 2004	CAA/CTA	517	517	Gln/Leu	2005	105 drug resistant strains (83 INH-resistant and 64 RMP-resistant) + 8 controls (H37Rv-susceptible, 4 INH-sensitive, 3 RMP-sensitive); Isolated from TB patients during second national survey of drug resistance in Poland; provided by National Tuberculosis Reference Laboratory in Warsaw. N=113	Poland	real-time sequencing FRET	RRDR
Rv0667	64	RIF	rpoB	Hillemann D AAC 2005	del CAG AAC	517	517-518	del Gln Asn	2001	113 strains (103 MDR and 10 randomly chosen fully susceptible). N=113	Germany	real-time sequencing	RRDR
Rv0667	65	RIF	rpoB	Kapur V JCM 1994	del CAG AAC	517	517-518	del Gln Asn	Published 1994	Clinical isolates, both RIF-R (n=121) and RIF-S (n=7); some of them had been studied previously. Total N=128	USA	Sequencing	Whole gene
Rv0667	66	RIF	rpoB	Secondary Publication: Ramaswamy S Musser JM Tubercle lung Dis 1998	del G AAC AA	517	517-519	Gln/His and del Asn Asn
Rv0667	67	RIF	rpoB	Wang Q JProtRes 2007	AAC/TAC	518	518	Asn/Tyr	Published 1997		China	Sequencing	Whole gene
Rv0667	68	RIF	rpoB	Siddiqi N AAC 2002	AAC/ACC	518	518	Asn/Thr	1995-1998	126 clinical isolates that were drug resistant. N=126	India	Sequencing	RRDR
Rv0667	69	RIF	rpoB	Hillemann D AAC 2005	AAC/ATC	518	518	Asn/Ile	2001	113 strains (103 MDR and 10 randomly chosen fully susceptible). N=113	Germany	real-time sequencing	RRDR
Rv0667	70	RIF	rpoB	Kim BJ JCM 1997	AAC/CAC	518	518	Asn/His	Published 1997	Clinical isolates, both RIF-R (n=32) and RIF-S (n=26) from different patients. Total N=58	South Korea	Sequencing and PCR-SSCP	RRDR
Rv0667	71	RIF	rpoB	Chan RCY JAC 2007	AAC/GAC	518	518	Asn/Asp	1994-2004	Consecutive isolates that exhibited resistance to one or more drugs. Grantham Hospital and Public Health Laboratory of Hong Kong	Hong Kong	PCR-SSCP, Sequencing	RRDR
Rv0667	72	RIF	rpoB	Bahrmand AR JCM 2009	AAC/AAG	519	519	Asn/Lys	2005-2006	286 isolates from sputa of patients with active pulmonary TB from the southern border of Iran, Zabol province, Afghanistan border.	Iran	Sequencing	411bp fragment of rpoB
Rv0667	73	RIF	rpoB	Heym B Lancet 1994	del AAC	519	519	del Asn	1991-1992	39 drug-resistant isolates analyzed: 16 strains resistant to H, 1 control - fully susceptible, 15 strains from other French hospitals but where susceptibility testing was done at the Pitie-Salpetriere lab. Taken from survey from 1991-1992 of drug resistance among isolates received for testing at Pietie-Salpetriere Hospital. N=39	Russia, Netherlands	PCR-SSCP
Rv0667	74	RIF	rpoB	Secondary Publication: Ramaswamy S Musser JM Tubercle lung Dis 1998	CTG/ATG	521	521	Leu/Met
Rv0667	75	RIF	rpoB	Taniguchi H FEMS Micro 1996	CTG/CCG	521	521	Leu/Pro	Published 1998	39 clinical isolates (including MDR-TB strains) from Koga Hospital, Nougata central hospital, and Fukuoka-Higashi hospital. N=39	Japan	Sequencing	Whole gene
Rv0667	76	RIF	rpoB	Secondary Publication: O'Sullivan DM JAntiChemo 2005	CTG/CTA	521	521	Leu/Leu
Rv0667	77	RIF	rpoB	Bodmer T JAC 1995	TCG/TTG	522	522	Ser/Leu	Published 1998	122 clinical isolates from patients from diverse geographical locations (Telenti et al, 1993a). 10 RMP-susceptible and 26 RMP-resistant isolates were examined. N=36	N.S.	PCR-SSCP	RRDR
Rv0667	78	RIF	rpoB	Yuen LK JCM 1999	TCG/CAG	522	522	Ser/Gln	1990-1997	50 clinical isolates collected from different reference laboratories in Australia: 17 RIF sensistive; 33 RIF resistant. N=50	Timor	Sequencing	RRDR
Rv0667	79	RIF	rpoB	Secondary Publication: O'Sullivan DM JAntiChemo 2005	TCG/TGG	522	522	Ser/Trp
Rv0667	80	RIF	rpoB	El Baghdadi J IJTLD 2003	CCC/ACC	523	523	Gly/Trp	1996-2001	122 isolates from 112 different patients; 42 Mtb isolates analyzed (37 resistant, 5 sensitive). N=122	Morocco	Sequencing	RRDR
Rv0667	81	RIF	rpoB	Pozzi G JCM 1999	GGG/TGG	523	523	Gly/Trp	Published April 2000	MDR isolates from three clinical microbiology laboratories; 37 isolates, proven to be from different patients, analyzed for this study. N=37	Italy	Sequencing	RRDR
Rv0667	82	RIF	rpoB	Bahrmand AR JCM 2009	GGG/GCG	523	523	Gly/Ala	2005-2006	286 isolates from sputa of patients with active pulmonary TB from the southern border of Iran, Zabol province, Afghanistan border.	Iran	Sequencing	411bp fragment of rpoB
Rv0667	83	RIF	rpoB	Valim A JCM 2000	TTG/TGG	524	524	Leu/Trp	1996-1998	100 isolates from different regions of Brazil: 26 samples (25 RIF-resistant; 1 RIF-susceptible) from Rio de Janeiro. N=100	Brazil	Sequencing	RRDR
Rv0667	84	RIF	rpoB	Zenteno-Cuevas R MemInstOswaldCruz 2009	TTG/TCG	524	524	Leu/Ser	2007		Mexico	Sequencing	RRDR
Rv0667	85	RIF	rpoB	Valim A JCM 2000	ACC/CCC	525	525	Thr/Pro	1996-1998	100 isolates from different regions of Brazil: 26 samples (25 RIF-resistant; 1 RIF-susceptible) from Rio de Janeiro. N=100	Brazil	Sequencing	RRDR
Rv0667	86	RIF	rpoB	Pozzi G JCM 1999	ACC/ATC	525	525	Thr/Ile	Published April 2001	MDR isolates from three clinical microbiology laboratories; 37 isolates, proven to be from different patients, analyzed for this study. N=37	Italy	Sequencing	RRDR
Rv0667	87	RIF	rpoB	Bahrmand AR JCM 2009	CAC/TTC	526	526	His/Phe	2005-2006	286 isolates from sputa of patients with active pulmonary TB from the southern border of Iran, Zabol province, Afghanistan border.	Iran	Sequencing	411bp fragment of rpoB
Rv0667	88	RIF	rpoB	Ramaswamy SV J Med Micro 2004	CAC/AAC	526	526	His/Asn	1996-2001	Subset of 186 strains initially isolated from patients who attended the Jose E. Gonzalez University Hospital TB clinic. N=37	Mexico	Sequencing
Rv0667	89	RIF	rpoB	Kapur V JCM 1994	CAC/GAC	526	526	His/Asp	Published 1994	Clinical isolates, both RIF-R (n=121) and RIF-S (n=7); some of them had been studied previously. Total N=128	USA	Sequencing	Whole gene
Rv0667	90	RIF	rpoB	Kapur V JCM 1994	CAC/TAC	526	526	His/Tyr	Published 1994	Clinical isolates, both RIF-R (n=121) and RIF-S (n=7); some of them had been studied previously. Total N=128	USA	Sequencing	Whole gene
Rv0667	91	RIF	rpoB	Secondary Publication: Ramaswamy S Musser JM Tubercle lung Dis 1998	CAC/ACC	526	526	His/Thr
Rv0667	92	RIF	rpoB	Prammananan T CMI 2008	CAC/AGC	526	526	His/Ser	2003-2005		Thailand	Sequencing	Whole gene
Rv0667	93	RIF	rpoB	Secondary Publication: Ramaswamy S Musser JM Tubercle lung Dis 1998	CAC/GGC	526	526	His/Gly
Rv0667	94	RIF	rpoB	Kim BJ JCM 1997	CAC/TGC	526	526	His/Cys	Published 1997	Clinical isolates, both RIF-R (n=32) and RIF-S (n=26) from different patients. Total N=58	South Korea	PCR-SSCP, Sequencing	RRDR
Rv0667	95	RIF	rpoB	Kim BJ JCM 1997	CAC/CGC	526	526	His/Arg	Published 1997	Clinical isolates, both RIF-R (n=32) and RIF-S (n=26) from different patients. Total N=58	South Korea	PCR-SSCP, Sequencing	RRDR
Rv0667	96	RIF	rpoB	Bodmer T JAC 1995	CAC/CCC	526	526	His/Pro	Published 2001	122 clinical isolates from patients from diverse geographical locations (Telenti et al, 1993a). 10 RMP-susceptible and 26 RMP-resistant isolates were examined. N=36	N.S.	PCR-SSCP	RRDR
Rv0667	97	RIF	rpoB	Valim A JCM 2000	CAC/CTG	526	526	His/Leu	1996-1998	100 isolates from different regions of Brazil: 26 samples (25 RIF-resistant; 1 RIF-susceptible) from Rio de Janeiro. N=100	Brazil	Sequencing	RRDR
Rv0667	98	RIF	rpoB	Sheng J JApplMicro 2008	CAC/CTT	526	526	His/Leu	2002-2003	56 isolates from patients with pulmonary TB in Zhejiang province	China	PCR-SSCP , Sequencing	RRDR
Rv0667	99	RIF	rpoB	Kapur V JCM 1994	CAC/CTC	526	526	His/Leu	Published 1994	Clinical isolates, both RIF-R (n=121) and RIF-S (n=7); some of them had been studied previously. Total N=128	USA	Sequencing	Whole gene
Rv0667	100	RIF	rpoB	Kapur V JCM 1994	CAC/CAA	526	526	His/Gln	Published 1994	Clinical isolates, both RIF-R (n=121) and RIF-S (n=7); some of them had been studied previously. Total N=128	USA	Sequencing	Whole gene
Rv0667	101	RIF	rpoB	Bodmer T JAC 1995	CAC/CAG	526	526	His/Gln	Published 2003	122 clinical isolates from patients from diverse geographical locations (Telenti et al, 1993a). 10 RMP-susceptible and 26 RMP-resistant isolates were examined. N=36		PCR-SSCP	RRDR
Rv0667	102	RIF	rpoB	Siddiqi N AAC 2002	AAG/AAT	527	527	Lys/Asn	1995-1998	126 clinical isolates that were drug resistant. N=126	India	Sequencing	RRDR
Rv0667	103	RIF	rpoB	Valim A JCM 2000	del AAG	527	527	del Lys	1996-1998	100 isolates from different regions of Brazil: 26 samples (25 RIF-resistant; 1 RIF-susceptible) from Rio de Janeiro. N=100	Brazil	Sequencing	RRDR
Rv0667	104	RIF	rpoB	Williams D AAC 1994	AAG/CAG	527	527	Lys/Gln	Published 1995	110 RIF-resistant and 10 RIF-susceptible strains from different geographic regions across the world. N=120	USA	PCR-HDF, Sequencing	RRDR
Rv0667	105	RIF	rpoB	Siddiqi N AAC 2002	CGC/CAC	528	528	Arg/His	1995-1998	126 clinical isolates that were drug resistant. N=126	India	Sequencing	RRDR
Rv0667	106	RIF	rpoB	Siddiqi N AAC 2002	CGC/CCC	528	528	Arg/Pro	1995-1998	126 clinical isolates that were drug resistant. N=126	India	Sequencing	RRDR
Rv0667	107	RIF	rpoB	Zenteno-Cuevas R MemInstOswaldCruz 2009	CGC/CCT	528	528	Arg/Pro	2007		Mexico	Sequencing	RRDR
Rv0667	108	RIF	rpoB	Wang Q JProtRes 2007	TCG/TAG	538	538	Leu/STOP	Published 1997		China	Sequencing	Whole gene
Rv0667	109	RIF	rpoB	Secondary Publication: Ramaswamy S Musser JM Tubercle lung Dis 1998	TCG/CAG	531	531	Ser/Gln
Rv0667	110	RIF	rpoB	Donabella V Am J Respir Cell Mol Biol 1994	TCG/TTG	531	531	Ser/Leu	Published 1994		USA	Sequencing	RRDR
Rv0667	111	RIF	rpoB	Bodmer T JAC 1995	TCG/TGG	531	531	Ser/Trp	Published 2005	122 clinical isolates from patients from diverse geographical locations (Telenti et al, 1993a). 10 RMP-susceptible and 26 RMP-resistant isolates were examined. N=36	N.S.	PCR-SSCP	RRDR
Rv0667	112	RIF	rpoB	Bodmer T JAC 1995	TCG/TAT	531	531	Ser/Tyr	Published 2006	122 clinical isolates from patients from diverse geographical locations (Telenti et al, 1993a). 10 RMP-susceptible and 26 RMP-resistant isolates were examined. N=36	N.S.	PCR-SSCP	RRDR
Rv0667	113	RIF	rpoB	Hillemann D AAC 2005	TCG/TTT	531	531	Ser/Phe	2001	113 strains (103 MDR and 10 randomly chosen fully susceptible). N=113	Germany	real-time sequencing	RRDR
Rv0667	114	RIF	rpoB	Secondary Publication: Ramaswamy S Musser JM Tubercle lung Dis 1998	TCG/TGT	531	531	Ser/Cys
Rv0667	115	RIF	rpoB	Moghazeh SL AAC 1996	CTG/CCG	533	533	Leu/Pro	1992-1995	RIF-R clinical isolates from strain database. N=24	USA	Sequencing	N.S
Rv0667	116	RIF	rpoB	Valim A JCM 2000	CTG/CCT	533	533	Leu/Pro	1996-1998	100 isolates from different regions of Brazil: 20 samples (19 RIF-resistant; 1 RIF-susceptible) from Sao Paulo. N=100	Brazil	Sequencing	RRDR
Rv0667	117	RIF	rpoB	Tracevska T JCM 2002	CCC/TCC	535	535	Pro/Ser	1999-2000	70 patients admitted to State Centre for Tuberculosis and Lung Diseases with clinical symptoms of lung or renal TB or TB meningitis. 25-60 yrs old; 2/3 male. 19 drug-susceptible; 34 MDR isolates were analyzed by LiPA. N=70	Latvia	Line probe assay, Sequencing	RRDR
Rv0667	118	RIF	rpoB	Prammananan T CMI 2008	CCC/CAC	535	535	Pro/His	2003-2005		Thailand	Sequencing	Whole gene
Rv0667	119	RIF	rpoB	Wang Q JProtRes 2007	CTG/CCG	538	538	Leu/Pro	Published 1997		China	Sequencing	Whole gene
Rv0667	120	RIF	rpoB	Prammananan T CMI 2008	GAG/GGG	541	541	Glu/Gly	2003-2005		Thailand	Sequencing	Whole gene
Rv0667	121	RIF	rpoB	Pozzi G JCM 1999	GAG/GAT	541	541	Glu/Gly	Published 2002	MDR isolates from three clinical microbiology laboratories; 37 isolates, proven to be from different patients, analyzed for this study. N=37	Italy	Sequencing	RRDR
Rv0667	122	RIF	rpoB	Aslan G JpnJInfectDis 2008	CTG/ATG	545	545	Leu/Met	2003-2006	Isolates from patients in Mersin University hospital in southern Turkey	Turkey	Sequencing	RRDR
Rv0667	123	RIF	rpoB	Pozzi G JCM 1999	TCG/GCG	553	553	Ser/Ala	Published 2003	MDR isolates from three clinical microbiology laboratories; 37 isolates, proven to be from different patients, analyzed for this study. N=37	Italy	Sequencing	RRDR
Rv0667	124	RIF	rpoB	Ramaswamy SV J Med Micro 2004	ATC/GTC	561	561	Ile/Val	1996-1998	Subset of 186 strains initially isolated from patients who attended the Jose E. Gonzalez University Hospital TB clinic + 13 pan-susceptible isolates. N=50	Mexico	Sequencing	RRDR
Rv0667	125	RIF	rpoB	Heep M JCM 2001	ATC/ACC	561	561	Ile/Thr	1997	80 RIF-resistant patients obtained during the year by the German National Reference Center for Mycobacteria + 18 samples (16 DNA samples and 2 culture samples) from previous studies were analyzed. N=98	Germany	Sequencing	RRDR
Rv0667	126	RIF	rpoB	Hauck Y JAC 2009	GAA/GGA	562	562	Glu/Gly	Published 2009	126 RIF resistant isolates were recovered from 142 patients by the reference centre for mycobacteria of the Service de Santé des Armées in a total of 18 countries. This mutation confer low level RIF resistance	Various	Sequencing	RRDR
Rv0667	127	RIF	rpoB	Hauck Y JAC 2009	CCT/CTT	564	564	Pro/Leu	Published 2009	126 RIF resistant isolates were recovered from 142 patients by the reference centre for mycobacteria of the Service de Santé des Armées in a total of 18 countries. This mutation confer low level RIF resistance	Various	Sequencing	RRDR
Rv0667	128	RIF	rpoB	Heep M JCM 2001	CTG/GTG	571	571	Leu/Val	1997	80 RIF-resistant patients obtained during the year by the German National Reference Center for Mycobacteria + 18 samples (16 DNA samples and 2 culture samples) from previous studies were analyzed. N=98	Germany	Sequencing	RRDR
Rv0667	129	RIF	rpoB	Yuen LK JCM 1999	ATC/TTC	572	572	Ile/Phe	1990-1997	51 clinical isolates collected from different reference laboratories in Australia: 17 RIF sensistive; 33 RIF resistant. N=50	Vietnam	Sequencing	RRDR
Rv0667	130	RIF	rpoB	Chan RCY JAC 2007	TCG/TTG	574	574	Ser/Leu	1994-2004	250 resistant isolates (resistant to 5 anti-tiuberculosis drugs) - none had apparent clonal features + 50 susceptible controls + 2 reference strains: ATCC 27294 H37Rv and ATCC 25117 H37Rag. N=302 isolates	Hong Kong	PCR-SSCP, Sequencing	RRDR
Rv0667	131	RIF	rpoB	Prammananan T CMI 2008	TCG/GCG	622	622	Ser/Ala	2003-2005		Thailand	Sequencing	Whole gene
Rv0667	132	RIF	rpoB	Heep M JCM 2001	CGC/TGC	633	633	Arg/Cys	1997	80 RIF-resistant patients obtained during the year by the German National Reference Center for Mycobacteria + 18 samples (16 DNA samples and 2 culture samples) from previous studies were analyzed. N=98	Germany	Sequencing	RRDR
Rv0667	133	RIF	rpoB	Heep M JCM 2001	GAG/GAT	672	672	Glu/Asp	1997	80 RIF-resistant patients obtained during the year by the German National Reference Center for Mycobacteria + 18 samples (16 DNA samples and 2 culture samples) from previous studies were analyzed. N=98	Germany	Sequencing	RRDR
