# Supplementary material for: The Structural Basis of Mycobacterium tuberculosis RpoB Drug-Resistant Clinical Mutations on Rifampicin Drug Binding
Source: Molecules. 2022 Jan 28;27(3):885. doi: 10.3390/molecules27030885 (PMC8839920; doi:10.3390/molecules27030885)
Supplement: Supplementary file 1 [file molecules-27-00885-s001.zip › RpoB_Molecules_Supplementary File S2.xlsx]

## Sheet: Sheet1
The rpoB mutations prioritized in this study	references
Asn519Thr	Sharma and Madan, Detection of Mutations in rpob Gene of Clinically Isolated M. tuberculosis by DNA Sequencing. J Mycobac Dis 2014, 4:4
Leu524met	Sharma and Madan, Detection of Mutations in rpob Gene of Clinically Isolated M. tuberculosis by DNA Sequencing. J Mycobac Dis 2014, 4:4
D435F	Detection of Drug-Resistant Tuberculosis by Xpert MTB/RIF in Swaziland. The New England Journal of Medicine, 2015
N437D	Detection of Drug-Resistant Tuberculosis by Xpert MTB/RIF in Swaziland. The New England Journal of Medicine, 2015
D435V	Detection of Drug-Resistant Tuberculosis by Xpert MTB/RIF in Swaziland. The New England Journal of Medicine, 2015
G442R	Detection of Drug-Resistant Tuberculosis by Xpert MTB/RIF in Swaziland. The New England Journal of Medicine, 2015
H445D	Detection of Drug-Resistant Tuberculosis by Xpert MTB/RIF in Swaziland. The New England Journal of Medicine, 2015
H445L	Detection of Drug-Resistant Tuberculosis by Xpert MTB/RIF in Swaziland. The New England Journal of Medicine, 2015
S450W	Detection of Drug-Resistant Tuberculosis by Xpert MTB/RIF in Swaziland. The New England Journal of Medicine, 2015
Asn413His	R. Thirumurugan et al.Molecular analysis of rpoB genemutations in rifampicin resistantMycobacterium tuberculosis isolates bymultiple allele specific polymerase chainreaction in Puducherry, South IndiaRavibalan.Journal of Infection and Public Health (2015) 8, 619—625
Ala451Asp	R. Thirumurugan et al.Molecular analysis of rpoB genemutations in rifampicin resistantMycobacterium tuberculosis isolates bymultiple allele specific polymerase chainreaction in Puducherry, South IndiaRavibalan.Journal of Infection and Public Health (2015) 8, 619—625
Arg511Cys	R. Thirumurugan et al.Molecular analysis of rpoB genemutations in rifampicin resistantMycobacterium tuberculosis isolates bymultiple allele specific polymerase chainreaction in Puducherry, South IndiaRavibalan.Journal of Infection and Public Health (2015) 8, 619—625
Val513Asp	R. Thirumurugan et al.Molecular analysis of rpoB genemutations in rifampicin resistantMycobacterium tuberculosis isolates bymultiple allele specific polymerase chainreaction in Puducherry, South IndiaRavibalan.Journal of Infection and Public Health (2015) 8, 619—625
Gln146Lys
Met515Val	Therdsak Prammananan,Distribution of Drug-Resistant Genes AmongDistribution of Drug-Resistant Genes Among Thai Multidrug-Resistant Mycobacterium Tuberculosis (MDR-TB) Clinical Isolates.Siriraj Med J, Volume 63, Number 3, May-June 2011
R529Q	Faustinos Tatenda Takawira1 et al.,Mutations in rpoB and katG genes of multidrug resistant mycobacterium tuberculosis undetectable using genotyping diagnostic methods.Pan African Medical Journal. 2017;27:145.
P564S	Faustinos Tatenda Takawira1 et al.,Mutations in rpoB and katG genes of multidrug resistant mycobacterium
Q490Y	tuberculosis undetectable using genotyping diagnostic methods.Pan African Medical Journal. 2017;27:145.
Ile491Phe	Andre E, Goeminne L, Colmant A, Beckert P, Niemann S, Delmee M, Novelrapid PCR for the detection of Ile491Phe rpoB mutation of Mycobacterium tuberculosis, a rifampicinresistance-conferring mutation undetected by commercial assays, Clinical Microbiology and Infection,2017
Asp435Gly	Bashir Ahmad et al. Mutation analysis for detection of drug resistance in mycobacterium tuberculosis isolates from Khyber Pakhtunkhwa, Pakistan.J Pak Med Assoc.Vol. 67, No. 11, November 2017
Ser450Gln	Bashir Ahmad et al. Mutation analysis for detection of drug resistance in mycobacterium tuberculosis isolates from Khyber Pakhtunkhwa, Pakistan.J Pak Med Assoc.Vol. 67, No. 11, November 2017
Pro454His	Bashir Ahmad et al. Mutation analysis for detection of drug resistance in mycobacterium tuberculosis isolates from Khyber Pakhtunkhwa, Pakistan.J Pak Med Assoc.Vol. 67, No. 11, November 2017
Gly455Asp	Bashir Ahmad et al. Mutation analysis for detection of drug resistance in mycobacterium tuberculosis isolates from Khyber Pakhtunkhwa, Pakistan.J Pak Med Assoc.Vol. 67, No. 11, November 2017
Val176Phe	Yu-Tze Horng et al.,2015.Molecular Analysis of Codon 548 in the rpoB Gene Involved in Mycobacterium tuberculosis Resistance to Rifampin.Antimicrobial Agents and Chemotherapy.59:1542–1548.
Ile502Val	Yu-Tze Horng et al.,2015.Molecular Analysis of Codon 548 in the rpoB Gene Involved in Mycobacterium tuberculosis Resistance to Rifampin.Antimicrobial Agents and Chemotherapy.59:1542–1548.
Leu538Phe	Yu-Tze Horng et al.,2015.Molecular Analysis of Codon 548 in the rpoB Gene Involved in Mycobacterium tuberculosis Resistance to Rifampin.Antimicrobial Agents and Chemotherapy.59:1542–1548.
Arg548His	Yu-Tze Horng et al.,2015.Molecular Analysis of Codon 548 in the rpoB Gene Involved in Mycobacterium tuberculosis Resistance to Rifampin.Antimicrobial Agents and Chemotherapy.59:1542–1548.
D435Y	Kusum Sharma et al. 2017.Whole Genome Sequencing of Mycobacterium tuberculosis Isolates From Extrapulmonary Sites.OMICS A Journal of Integrative Biology.
L430P	Kusum Sharma et al. 2017.Whole Genome Sequencing of Mycobacterium tuberculosis Isolates From Extrapulmonary Sites.OMICS A Journal of Integrative Biology.
L452P	Kusum Sharma et al. 2017.Whole Genome Sequencing of Mycobacterium tuberculosis Isolates From Extrapulmonary Sites.OMICS A Journal of Integrative Biology.
